# Supplementary material for: PbBe2B2O6: an ultraviolet nonlinear-optical crystal with unprecedented π–π interacting BeBO5 group
Source: Royal Society of Chemistry journal article supplement (doi:10.1039/d2cc04631h), 2022-01-01
Supplement: d2cc04631h1.pdf [file d2cc04631h1.pdf]

## Supporting Information

### **PbBe<sub>2</sub>B<sub>2</sub>O<sub>6</sub>: An Excellent Ultraviolet Nonlinear-Optical Crystal with Unprecedented $\pi$ - $\pi$ Interacting BeBO<sub>5</sub> Group**

Yi-Gang Chen,<sup>#a</sup> Xingxing Jiang,<sup>#b</sup> Yuanyu Yang,<sup>a</sup> Zhe Dai,<sup>a</sup> Zheshuai Lin<sup>\*b</sup> and Xian-Ming Zhang<sup>\*ac</sup>

<sup>a</sup> Key Laboratory of Magnetic Molecules and Magnetic Information Material of Ministry of Education, School of Chemistry and Material Science, Shanxi Normal University, Taiyuan 030031, China

<sup>b</sup> Functional Crystal Group, Technical Institute of Physics and Chemistry, Chinese Academy of Sciences, Beijing 100190, China

<sup>c</sup> College of Chemistry, Key Laboratory of Interface Science and Engineering in Advanced Material, Ministry of Education, Taiyuan University of Technology, Taiyuan 030024, China.

\*Corresponding authors: email address: zslin@mail.ipc.ac.cn;

zhangxm@dns.sxnu.edu.cn.

## Table of Contents

**Section S1** Experimental Section, Characterization and Computational Method.

**Table S1.** Reported Pb(II)-containing borates with stereochemically-active lone-pair.

**Table S2.** Crystal data and structure refinement for  $\text{PbBe}_2\text{B}_2\text{O}_6$ .

**Table S3.** Atomic coordinates and equivalent isotropic displacement parameters ( $\text{\AA}^2$ ) for  $\text{PbBe}_2\text{B}_2\text{O}_6$ .

**Table S4.** Selected bond lengths ( $\text{\AA}$ ) and angles (deg) for  $\text{PbBe}_2\text{B}_2\text{O}_6$ .

**Table S5.** Optical properties of reported UV NLO  $\text{BeO}_4$ -containing beryllium borate crystals and  $\text{PbBe}_2\text{B}_2\text{O}_6$ .

**Table S6.** Optical properties of the main UV NLO borates, carbonates and nitrates.

**Figure S1.** Single-crystal samples of  $\text{PbBe}_2\text{B}_2\text{O}_6$  before soaked in distilled water (a), and after soaked in distilled water for two months (b).

**Figure S2.** TG and DSC curves of  $\text{PbBe}_2\text{B}_2\text{O}_6$ .

**Figure S3.** Powder XRD patterns of  $\text{PbBe}_2\text{B}_2\text{O}_6$  before and after melting.

**Figure S4.** IR spectrum of  $\text{PbBe}_2\text{B}_2\text{O}_6$ .

**Figure S5.** UV–visible–near-IR diffuse reflectance spectrum of  $\text{PbBe}_2\text{B}_2\text{O}_6$ .

**Figure S6.** Electronic band structure of  $\text{PbBe}_2\text{B}_2\text{O}_6$ .

**Figure S7.** SHG-weighted electron density calculation of  $\text{PbBe}_2\text{B}_2\text{O}_6$ .

**References.**

## Section S1.

### Experimental Section

**Reagents.** As raw materials, BeO (99.9%), H<sub>3</sub>BO<sub>3</sub> (99.99%), PbCO<sub>3</sub> (99.99%), PbO (99.9%), and PbF<sub>2</sub> (99.99%) were all purchased from Aladdin and used as received.

**Crystal Growth.** *Caution!* Because of the high toxicity of BeO powder upon inhalation, all of the experiments were performed under sufficient ventilation. Crystals of PbBe<sub>2</sub>B<sub>2</sub>O<sub>6</sub> were prepared via high-temperature solid-state reactions using PbO-PbF<sub>2</sub>-B<sub>2</sub>O<sub>3</sub> as the flux. Raw materials PbCO<sub>3</sub>, BeO, and H<sub>3</sub>BO<sub>3</sub> in the molar ratio of 3:1:6 were ground thoroughly in an agate mortar, pressed into a pellet, placed in a Pt crucible, and heated in a muffle furnace at 550 °C for 12 h. Then, the material was reground thoroughly, pressed into a pellet, and heated at 650 °C for 24 h. Next, the obtained material (2.98 g), PbO (0.456 g, 2 mmol), and PbF<sub>2</sub> (0.981 g, 4 mmol) were ground thoroughly in an agate mortar, pressed into a pellet, and gradually heated at 670 °C for 36 h to ensure homogeneity. The temperature was then lowered to 590 °C at a rate of 2 °C/h, cooled to 500 °C at a rate of 1 °C/h, and finally cooled to 350 °C at a rate of 1.5 °C/h before the furnace was turned off. Colorless and transparent block millimetre-sized crystals were obtained after dissolving the flux in water. The PbBe<sub>2</sub>B<sub>2</sub>O<sub>6</sub> crystals were soaked in distilled water for two months at ambient temperature to evaluate the water stability (Figure S1a). There is little change in the shape or weight loss after drying (Figure S1b), showing that the PbBe<sub>2</sub>B<sub>2</sub>O<sub>6</sub> crystal is water-insoluble at ambient temperature.

### Characterization

**Single-Crystal X-Ray Diffraction (XRD).** Single-crystal XRD data were collected on a Bruker D8 Venture diffractometer at 293 K using graphite-monochromized Mo  $K_{\alpha}$  radiation ( $\lambda = 0.71073 \text{ \AA}$ ). The structure was solved by direct methods with the program *SHELXS* and refined by the full-matrix least-squares program *SHELXL*.<sup>1</sup> The structure had been carefully checked by the program *PLATON*<sup>2</sup> and no higher symmetries were found. The details of relevant crystallographic data are summarized in Table S2. The atomic coordinates and equivalent isotropic displacement parameters are listed in Table S3. The selected bond distances and angles are showed in Table S4.

**Powder X-Ray Diffraction (XRD).** Powder XRD data were collected using a Bruker Model D8 Advance powder diffractometer equipped with Cu  $K_{\alpha}$  radiation ( $\lambda = 1.5418 \text{ \AA}$ ) in the  $2\theta$  angular range of  $5\text{--}120^{\circ}$  with a scan step width of  $0.01^{\circ}$ . The experimental XRD pattern was in good agreement with the calculated one.

**Element Analysis.** Element analysis of  $\text{PbBe}_2\text{B}_2\text{O}_6$  was performed by a Jobin Yvon Ultima2 inductively coupled plasma optical emission spectrometer (ICP-OES) with Sepex Certiprep standards. The samples were dissolved in the perchloric acid at the boiling point for 30 min.

**Thermal Behavior.** Thermogravimetry (TG) and differential scanning calorimetry (DSC) analysis of  $\text{PbBe}_2\text{B}_2\text{O}_6$  were carried out on a NETZSCH STA 449 F5 Jupiter simultaneous analyze under flowing nitrogen. About 15 mg polycrystalline samples were placed in Pt crucibles, and heated from room temperature to  $1050 \text{ }^{\circ}\text{C}$  at the rate of  $10 \text{ }^{\circ}\text{C}/\text{min}$  under flowing  $\text{N}_2$  atmosphere. The thermogravimetry (TG) and differential scanning calorimetry (DSC) curves of  $\text{PbBe}_2\text{B}_2\text{O}_6$  (Figure S2) show that

the weight loss in the TG curve was not obviously observed up to 1000 °C, and an endothermic peak at 852 °C in the DSC curve was detected. Powder XRD of the residues (Figure S3) suggests that  $\text{PbBe}_2\text{B}_2\text{O}_6$  is an incongruently melting compound and thereby large crystal should be grown by the flux method. Single-crystals of  $\text{PbBe}_2\text{B}_2\text{O}_6$  were grown by using the flux of  $\text{PbO-PbF}_2\text{-B}_2\text{O}_3$ .

**Solid-State Nuclear Magnetic Resonance (NMR) Spectroscopy.**  $^9\text{Be}$  solid-state magic-angle spinning (MAS) NMR spectroscopy was recorded on a Bruker Avance 600 III HD spectrometer at a magnetic field strength of 14.9 T at room temperature. The experiment was operated at a MAS frequency of 10 kHz with a relaxation delay of 1s and tube diameter of 3.2 mm. In order to further check the local coordination of the  $\text{BeO}_3$  unit in  $\text{PbBe}_2\text{B}_2\text{O}_6$ , three  $\text{BeO}_4$ -containing structures  $\text{BeO}$ ,  $\text{BeSO}_4\cdot 4\text{H}_2\text{O}$  (99.99%, Aladdin) and our reported  $\text{Cs}_4\text{LiBe}_4\text{P}_7\text{O}_{24}$ <sup>3</sup> were used as the reference samples. The chemical shifts were referenced by using the  $^9\text{Be}$  shift of  $\text{BeSO}_4\cdot 4\text{H}_2\text{O}$  ( $\delta$   $^9\text{Be}$  = 0.00 ppm). Note that the signal intensities of  $\text{PbBe}_2\text{B}_2\text{O}_6$ ,  $\text{Cs}_4\text{LiBe}_4\text{P}_7\text{O}_{24}$  and  $\text{BeO}$  become 6.5, 2.5 and 0.3 times of their original intensity, respectively, to more clearly fulfil the comparison of the chemical shifts.

**Infrared (IR) Spectroscopy.** Fourier transform infrared (FTIR) spectrum of  $\text{PbBe}_2\text{B}_2\text{O}_6$  was recorded from KBr pellets in the range 2000–400  $\text{cm}^{-1}$  on a Nicolet Model 5DX spectrometer. FTIR spectra of  $\text{PbBe}_2\text{B}_2\text{O}_6$  is shown in Figure S4. The fundamental vibration wavenumbers of  $\text{BO}_3$  units in the four distinct peaks 1258, 977, 778 and 608  $\text{cm}^{-1}$  are in good agreement with the known borates with  $\text{BO}_3$  units.<sup>4</sup> The absorption peaks at 1258, 977 and 853  $\text{cm}^{-1}$  are assigned to the asymmetric and the

symmetric stretching vibrations of  $\text{BO}_3$  units, respectively. The absorption peaks at 778, 698, 608, and  $543\text{ cm}^{-1}$  are attributed to the symmetric and asymmetric bending vibrations of  $\text{BO}_3$  units, respectively.

**Transmission Spectroscopy.** Optical transmission spectrum of the  $\text{PbBe}_2\text{B}_2\text{O}_6$  single-crystal was collected on a Shimadzu SolidSpec-3700 spectrometer in the 220–3200 nm region. An unpolished crystal with a size of  $6.8 \times 2.5 \times 1.2\text{ mm}^3$  was used to perform the measurements.

**UV–vis–near-IR Diffuse Reflection Spectroscopy.** UV–vis–near-IR diffuse reflection spectrum of  $\text{PbBe}_2\text{B}_2\text{O}_6$  was collected at 298 K using powder samples with  $\text{BaSO}_4$  as a standard on a Cary 5000 UV–Vis–Near-IR spectrophotometer in the range 200–1500 nm. Reflectance spectra were converted to absorbance using the Kubelka–Munk function:  $F(R) = (1 - R)^2/2R = K/S$ , where  $R$  is the reflectance,  $K$  is the absorption, and  $S$  is the scattering.<sup>5</sup> Measurement of the UV–visible–near-IR diffuse reflectance spectrum shows that  $\text{PbBe}_2\text{B}_2\text{O}_6$  has a bandgap ( $E_g$ ) of 4.13 eV, with a broad optical bandgap (Figure S5).

**Second-Harmonic Generation (SHG).** Powder SHG measurements of  $\text{PbBe}_2\text{B}_2\text{O}_6$  were performed by a Kurtz-Perry method<sup>6</sup> at 298 K. The measurement was carried out with a Q-switched Nd: YAG solid-state laser at a wavelength of 1064 nm. The crystals  $\text{PbBe}_2\text{B}_2\text{O}_6$  were ground and sieved into a series of distinct size ranges: 20–40  $\mu\text{m}$ , 40–60  $\mu\text{m}$ , 60–80  $\mu\text{m}$ , 80–120  $\mu\text{m}$ , 120–150  $\mu\text{m}$ , 150–200  $\mu\text{m}$ , and 200–300  $\mu\text{m}$ , which were pressed between quartz glass slides and secured with tape in 1-mm-thick aluminum holders containing a hole 8 mm in diameter. Each of them was then placed

into a light-tight box, and the intensity of frequency-doubled output emitted from the samples was collected through a photomultiplier tube. Polycrystalline  $\text{KH}_2\text{PO}_4$  (KDP) as the reference were ground and sieved into the same particle size ranges. The SHG signal intensity of the  $\text{PbBe}_2\text{B}_2\text{O}_6/\text{KDP}$  ratio was identified based on the same size (150–200  $\mu\text{m}$ ).

**Birefringence Measurement.** The birefringence of  $\text{PbBe}_2\text{B}_2\text{O}_6$  was observed on a CNOPTec cross-polarizing microscope BK-POLR with a LED light filter. The LED light source has the optical wavelength of  $590 \pm 3$  nm. The birefringence was calculated by using the Eq. 1:

$$R = d \times |N_e - N_o| = d \times \Delta n$$

where  $R$ ,  $d$ , and  $\Delta n$  represent the optical retardation, thickness of the crystal, and birefringence, respectively.

**Bond-valence-sum (BVS) calculations.** The bond valence sums were calculated using the formula  $V_i = \sum S_{ij} = \sum \exp[(r_0 - r_{ij})/B]$ , where  $S_{ij}$  is the bond valence associated with the bond length  $r_{ij}$ , and  $r_0$  and  $B$  (usually 0.37) are empirically determined parameters.<sup>7</sup>

## Computational Method

### Density functional theory (DFT) calculations.

First-principles calculations were performed by using CASTEP package based on density functional theory (DFT).<sup>8</sup> The functional developed by Perdew, Burke and Ernzerhof (PBE) in the generalized gradient approximation (GGA) form was adopted to describe the exchange-correlation energy.<sup>9</sup> The optimized norm-conserving pseudopotential<sup>10</sup> for Be, B, Pb, and O allowed us to use a small plane-wave basis set

without compromising the accuracy required for the calculation. A kinetic energy cutoff of 800 eV and Monkhorst-Pack<sup>11</sup> k-point mesh spanning less than 0.03 Å<sup>-1</sup> in the Brillouin zone were chosen.

The calculated band gap of 3.31 eV (Figure S6) by GGA-PBE is smaller than the experimental data (4.13 eV) due to the discontinuity in the exchange-correlation functional, so a scissor operator<sup>12</sup> was used to shift the conduction band upward to agree with the measured data. The imaginary part of the dielectric function of the electronic transition between the valence bands (VB) and the conduction bands (CB) was calculated from the scissor-operator-corrected electronic band structure. The real part of the dielectric function, i.e., the refractive indices, was then determined by a Kramers-Kronig transform. The anisotropic SHG coefficients were calculated using a program developed by our group.<sup>13</sup> To investigate the contribution of the constituent groups to the SHG response, real-space atom-cutting analysis was performed on the crystals.<sup>14</sup> In real-space atom-cutting analysis, when the contribution to the optical properties of a specified ion (or group) is of interest, the wavefunction in the zones belonging to the other ions (groups) is set to zero (which is referred to as “atom cutting”). The contribution of the ion (group) of interest to the n-th polarizability is  $\chi^n(X) = \chi^n$  (all the atoms being cut except X). In the SHG-weighted electronic cloud calculations, the probability densities of all occupied (valence) or unoccupied (conduction) states projected onto real space are multiplied by a weighting factor that is related to the contribution to SHG efficiency by the virtual electron (VE) and virtual hole (VH) processes.<sup>15</sup> This ensures that the quantum states irrelevant to SHG are not shown in



the occupied or unoccupied “SHG-densities”, while the orbitals vital to SHG are intuitively highlighted in real space. Single point calculations were carried out at the M06/6-311++G\*\* level<sup>16</sup> based upon structures derived from single-crystal XRD.

To further understand the origin of SHG, the electron densities of the occupied and unoccupied states in the virtual electron (VE) and virtual hole (VH) processes are visualized by the SHG-weighted electron density calculation (Figure S7). In the VE process the O 2p orbitals of BeO<sub>3</sub> and BO<sub>3</sub> units in the occupied states and the anti- $\pi$  orbitals of BeO<sub>3</sub> and BO<sub>3</sub> units in the unoccupied states have the large SHG contribution. The O 2p orbitals of PbO<sub>4</sub> units in the occupied states and the Pb lone-pair in the unoccupied states manifest the considerable SHG density. In the VH process the SHG densities mainly arise from BeO<sub>3</sub>, BO<sub>3</sub> and PbO<sub>4</sub> with active lone-pair. The analyses show that BeO<sub>3</sub>, BO<sub>3</sub>, and PbO<sub>4</sub> units are responsible for strong SHG response.

**Table S1.** Reported Pb(II)-containing borates with stereochemically-active lone-pair.

| Compounds                                                                                              | Space group                                                       | BO <sub>3</sub> existence | BO <sub>4</sub> existence | References |
|--------------------------------------------------------------------------------------------------------|-------------------------------------------------------------------|---------------------------|---------------------------|------------|
| Pb <sub>4</sub> O(BO <sub>3</sub> ) <sub>2</sub>                                                       | <i>Aba2</i>                                                       | Yes                       | No                        | 17         |
| Pb <sub>2</sub> O[BO <sub>2</sub> (OH)]                                                                | <i>C2/m</i>                                                       | Yes                       | No                        | 18         |
| PbCaB <sub>2</sub> O <sub>5</sub>                                                                      | <i>P</i> $\bar{1}$                                                | Yes                       | No                        | 19         |
| Ba <sub>2</sub> Pb(B <sub>3</sub> O <sub>6</sub> ) <sub>2</sub>                                        | <i>P</i> $\bar{3}c$                                               | Yes                       | No                        | 20         |
| PbBiBO <sub>4</sub>                                                                                    | <i>P2<sub>1</sub>/n</i>                                           | Yes                       | No                        | 21         |
| PbBiBO <sub>4</sub>                                                                                    | <i>Cmca</i>                                                       | Yes                       | No                        | 21         |
| Pb <sub>6</sub> B <sub>3</sub> O <sub>10</sub> X (X = F, Cl, Br)                                       | <i>Pbcm</i>                                                       | Yes                       | No                        | 22         |
| Pb <sub>3</sub> OBO <sub>3</sub> F                                                                     | <i>Pbcm</i>                                                       | Yes                       | No                        | 23         |
| Pb <sub>2</sub> BO <sub>3</sub> F                                                                      | <i>P6<sub>3</sub>/m</i>                                           | Yes                       | No                        | 24         |
| Pb <sub>2</sub> BO <sub>3</sub> Cl                                                                     | <i>P321</i>                                                       | Yes                       | No                        | 25         |
| Pb <sub>4</sub> O[Pb <sub>2</sub> (BO <sub>3</sub> ) <sub>3</sub> Cl]                                  | <i>Pbcm</i>                                                       | Yes                       | No                        | 26         |
| Pb <sub>2</sub> BO <sub>3</sub> Br                                                                     | <i>P321</i>                                                       | Yes                       | No                        | 27         |
| [O <sub>2</sub> Pb <sub>3</sub> ] <sub>2</sub> (BO <sub>3</sub> )Br                                    | <i>Cmcm</i>                                                       | Yes                       | No                        | 28         |
| Pb <sub>2</sub> (O <sub>4</sub> Pb <sub>8</sub> )(BO <sub>3</sub> ) <sub>3</sub> Br <sub>3</sub>       | <i>C2/c</i>                                                       | Yes                       | No                        | 29         |
| Pb <sub>2</sub> (O <sub>8</sub> Pb <sub>12</sub> )(BO <sub>3</sub> ) <sub>2</sub> Br <sub>6</sub>      | <i>C2/c</i>                                                       | Yes                       | No                        | 29         |
| Pb <sub>10</sub> O <sub>4</sub> (BO <sub>3</sub> ) <sub>3</sub> I <sub>3</sub>                         | <i>Cc</i>                                                         | Yes                       | No                        | 30         |
| [O <sub>2</sub> Pb <sub>3</sub> ] <sub>2</sub> (BO <sub>3</sub> )I                                     | <i>Pmmm</i>                                                       | Yes                       | No                        | 31         |
| Pb <sub>2</sub> Ba <sub>3</sub> (BO <sub>3</sub> ) <sub>3</sub> Cl                                     | <i>C222<sub>1</sub></i>                                           | Yes                       | No                        | 32         |
| Pb <sub>2</sub> Ba <sub>3</sub> (BO <sub>3</sub> ) <sub>3</sub> Br                                     | <i>C222<sub>1</sub></i>                                           | Yes                       | No                        | 33         |
| Pb <sub>6</sub> Ba <sub>2</sub> (BO <sub>3</sub> ) <sub>5</sub> X (X = Cl, Br)                         | <i>C2/m</i>                                                       | Yes                       | No                        | 34         |
| PbMBO <sub>4</sub> (M = Cr, Mn, Fe)                                                                    | <i>Pnma</i>                                                       | Yes                       | No                        | 35         |
| PbAlBO <sub>4</sub>                                                                                    | <i>Pnma</i>                                                       | Yes                       | No                        | 36         |
| PbAlBO <sub>4</sub>                                                                                    | <i>Pbcn</i>                                                       | Yes                       | No                        | 37         |
| PbMn <sub>0.5</sub> Al <sub>0.5</sub> BO <sub>4</sub>                                                  | <i>P4/mbm</i>                                                     | Yes                       | No                        | 37         |
| PbMn <sub>0.5</sub> Al <sub>0.5</sub> BO <sub>4</sub>                                                  | <i>Pnam</i>                                                       | Yes                       | No                        | 38         |
| Pb <sub>4</sub> VBO <sub>8</sub>                                                                       | <i>P2<sub>1</sub>/c</i>                                           | Yes                       | No                        | 39         |
| Pb <sub>6</sub> B <sub>2</sub> WO <sub>12</sub>                                                        | <i>Cmcm</i>                                                       | Yes                       | No                        | 40         |
| Pb <sub>2</sub> CuB <sub>2</sub> O <sub>6</sub>                                                        | <i>P2<sub>1</sub>/c</i>                                           | Yes                       | No                        | 41         |
| PbZn <sub>2</sub> (BO <sub>3</sub> ) <sub>2</sub>                                                      | <i>Pccn</i>                                                       | Yes                       | No                        | 42         |
| (Pb <sub>3</sub> O) <sub>2</sub> (BO <sub>3</sub> ) <sub>2</sub> WO <sub>4</sub>                       | <i>Cmcm</i>                                                       | Yes                       | No                        | 43         |
| Pb <sub>1-x</sub> Sr <sub>x</sub> MnBO <sub>4</sub> (x = 0, 0.5)                                       | <i>Pnma</i>                                                       | Yes                       | No                        | 44         |
| Li <sub>2</sub> Pb <sub>2</sub> CuB <sub>4</sub> O <sub>10</sub>                                       | <i>C2/c</i>                                                       | Yes                       | No                        | 45         |
| Pb <sub>2</sub> Mg <sub>2</sub> TeB <sub>2</sub> O <sub>10</sub>                                       | <i>Cmca</i>                                                       | Yes                       | No                        | 46         |
| $\alpha/\beta/\gamma$ -Pb <sub>2</sub> Ba <sub>4</sub> Zn <sub>4</sub> B <sub>14</sub> O <sub>31</sub> | <i>P1, Cc,</i><br><i>P3<sub>2</sub></i>                           | Yes                       | No                        | 47         |
| $\alpha/\beta/\gamma$ -Pb <sub>5</sub> Zn <sub>4</sub> B <sub>6</sub> O <sub>18</sub>                  | <i>P2<sub>1</sub>/c, P</i> $\bar{1}$ ,<br><i>P2<sub>1</sub>/c</i> | Yes                       | No                        | 48         |
| Pb <sub>7</sub> O(OH) <sub>3</sub> (CO <sub>3</sub> ) <sub>3</sub> (BO <sub>3</sub> )                  | <i>P6<sub>3</sub>mc</i>                                           | Yes                       | No                        | 49         |

|                                                                                                                                |             |     |     |    |
|--------------------------------------------------------------------------------------------------------------------------------|-------------|-----|-----|----|
| $\text{Pb}_2(\text{BO}_3)(\text{NO}_3)$                                                                                        | $P6_3mc$    | Yes | No  | 50 |
| $\text{Pb}_4\text{O}(\text{BO}_3)(\text{PO}_4)$                                                                                | $P2_1/c$    | Yes | No  | 51 |
| $\text{LiPb}_4(\text{BO}_3)(\text{PO}_4)_2$                                                                                    | $Pbca$      | Yes | No  | 52 |
| $\text{Pb}_4(\text{BO}_3)_2(\text{SO}_4)$                                                                                      | $P2_1/c$    | Yes | No  | 53 |
| $\text{Pb}_2[(\text{BO}_2)(\text{OH})](\text{SO}_4)$                                                                           | $P2_1/m$    | Yes | No  | 53 |
| $\text{Pb}_{47}\text{O}_{24}(\text{OH})_{13}\text{Cl}_{25}(\text{BO}_3)_2(\text{CO}_3)$                                        | $Cm$        | Yes | No  | 54 |
| $[\text{Pb}_{32}\text{O}_{18}][\text{Pb}_4\text{Mn}_2\text{O}]\text{Cl}_{14}(\text{BO}_3)_8 \cdot 2\text{H}_2\text{O}$         | $Pmnm$      | Yes | No  | 55 |
| $[\text{Pb}_7(\text{OH})_3\text{F}(\text{BO}_3)_2(\text{CO}_3)][\text{Mg}_{4.5}(\text{OH})_3(\text{Si}_5\text{O}_{14})]$       | $P\bar{1}$  | Yes | No  | 56 |
| $\text{Pb}_{24}\text{Mg}_9(\text{Si}_9\text{AlO}_{28})(\text{SiO}_4)(\text{BO}_3)(\text{CO}_3)_{10}(\text{OH})_{14}\text{O}_4$ | $P\bar{1}$  | Yes | No  | 57 |
| $(\text{Pb}_4\text{O})\text{Pb}_2\text{B}_6\text{O}_{14}$                                                                      | $P\bar{1}$  | Yes | Yes | 58 |
| $\text{Pb}_6\text{B}_{10}\text{O}_{21}$                                                                                        | $P\bar{1}$  | Yes | Yes | 59 |
| $\text{PbB}_4\text{O}_7$                                                                                                       | $P2_1nm$    | Yes | Yes | 60 |
| $\text{Pb}_4\text{B}_6\text{O}_{13}$                                                                                           | $Cc$        | Yes | Yes | 61 |
| $\text{Pb}_6\text{B}_4\text{O}_{11}(\text{OH})_2$                                                                              | $Pnma$      | Yes | Yes | 62 |
| $\text{Pb}_6\text{B}_{12}\text{O}_{21}(\text{OH})_6$                                                                           | $P3_2$      | Yes | Yes | 63 |
| $\text{Pb}_6\text{B}_{11}\text{O}_{18}(\text{OH})_9$                                                                           | $P3_2$      | Yes | Yes | 64 |
| $\text{Pb}_2\text{B}_3\text{O}_{5.5}(\text{OH})_2$                                                                             | $Pnn2$      | No  | Yes | 65 |
| $\text{NaPbB}_5\text{O}_9$                                                                                                     | $P2_1/c$    | Yes | Yes | 66 |
| $\text{PbCd}_2\text{B}_6\text{O}_{12}$                                                                                         | $P2_1/n$    | Yes | Yes | 67 |
| $\text{Pb}_4\text{Zn}_2\text{B}_{10}\text{O}_{21}$                                                                             | $Pbcn$      | Yes | Yes | 68 |
| $\text{Pb}_2\text{Cu}_3\text{B}_4\text{O}_{11}$                                                                                | $P2/n$      | Yes | Yes | 69 |
| $\text{PbLnB}_7\text{O}_{13}$ (Ln=Tb, Eu, Gd, Sm)                                                                              | $P2_1$      | Yes | Yes | 70 |
| $\text{Pb}_3(\text{B}_3\text{O}_7)(\text{NO}_3)$                                                                               | $Pnma$      | Yes | Yes | 65 |
| $\text{Pb}_6\text{B}_2\text{Si}_8\text{O}_{25}$                                                                                | $R\bar{3}c$ | No  | Yes | 71 |
| $\text{Na}_3\text{Pb}[\text{B}(\text{O}_3\text{POH})_4]$                                                                       | $I4_1/a$    | No  | Yes | 72 |
| $\text{Pb}_4\text{Co}_2[\text{B}(\text{OH})_2\text{P}_2\text{O}_8](\text{PO}_4)_2\text{Cl}$                                    | $P\bar{3}c$ | No  | Yes | 73 |
| $\text{Pb}_6(\text{Li}_{0.648}\text{Na}_{0.192})[\text{B}_{12}\text{O}_{24}]\text{I}_{0.84} \cdot 0.168\text{H}_2\text{O}$     | $R\bar{3}m$ | Yes | Yes | 74 |

**Table S2.** Crystal data and structure refinement for PbBe<sub>2</sub>B<sub>2</sub>O<sub>6</sub>.

| Empirical formula                                               | PbBe <sub>2</sub> B <sub>2</sub> O <sub>6</sub>                 |
|-----------------------------------------------------------------|-----------------------------------------------------------------|
| Formula weight                                                  | 342.83                                                          |
| Temperature                                                     | 293(2) K                                                        |
| Crystal system                                                  | Orthorhombic                                                    |
| Space group                                                     | <i>Pmn</i> 2 <sub>1</sub>                                       |
| a/Å                                                             | 10.737(2)                                                       |
| b/Å                                                             | 4.7501(11)                                                      |
| c/Å                                                             | 4.5368(11)                                                      |
| α/°                                                             | 90                                                              |
| β/°                                                             | 90                                                              |
| γ/°                                                             | 90                                                              |
| Volume/Å <sup>3</sup>                                           | 231.39(9)                                                       |
| Z                                                               | 2                                                               |
| ρ <sub>calc</sub> g/cm <sup>3</sup>                             | 4.920                                                           |
| μ/mm <sup>-1</sup>                                              | 36.403                                                          |
| F(000)                                                          | 296                                                             |
| Theta range for data collection                                 | 3.795 to 30.442°                                                |
| Refinement method                                               | Full-matrix least-squares on <i>F</i> <sup>2</sup>              |
| Goodness-of-fit on <i>F</i> <sup>2</sup>                        | 1.117                                                           |
| Flack parameter                                                 | 0.46(3)                                                         |
| Extinction coefficient                                          | 0.065(4)                                                        |
| Final <i>R</i> indexes [ <i>I</i> >2σ( <i>I</i> )] <sup>a</sup> | <i>R</i> <sub>1</sub> = 0.0173, <i>wR</i> <sub>2</sub> = 0.0425 |
| Final <i>R</i> indexes [all data] <sup>a</sup>                  | <i>R</i> <sub>1</sub> = 0.0173, <i>wR</i> <sub>2</sub> = 0.0425 |

<sup>a</sup> $R_1 = \sum ||F_o| - |F_c|| / \sum |F_o|$ , and  $wR_2 = [w(F_o^2 - F_c^2)^2 / w(F_o^2)^2]^{1/2}$

**Table S3.** Atomic coordinates and equivalent isotropic displacement parameters ( $\text{\AA}^2$ ) for  $\text{PbBe}_2\text{B}_2\text{O}_6$ .  $U(\text{eq})$  is defined as one-third of the trace of the orthogonalized  $U_{ij}$  tensor.

| Atom  | Wyck | Site | $x/a$       | $y/b$       | $z/c$       | $U(\text{eq})$ | BVS  |
|-------|------|------|-------------|-------------|-------------|----------------|------|
| Pb(1) | 2a   | m    | 0           | -0.82387(5) | -0.1439(4)  | 0.01651(17)    | 1.87 |
| Be(1) | 4b   | 1    | -0.2489(11) | -1.3208(16) | -0.207(2)   | 0.017(2)       | 2.03 |
| B(1)  | 4b   | 1    | -0.1581(9)  | -1.1617(15) | -0.5750(18) | 0.0155(18)     | 3.22 |
| O(1)  | 4b   | 1    | 0.1363(5)   | -0.9042(11) | -0.635(8)   | 0.0429(18)     | 1.89 |
| O(2)  | 4b   | 1    | -0.1327(6)  | -1.2016(12) | -0.2800(13) | 0.0180(11)     | 2.18 |
| O(3)  | 4b   | 1    | -0.2911(6)  | -1.6194(13) | -0.2370(12) | 0.0172(10)     | 1.94 |

**Table S4.** Selected bond distances (Å) and angles (deg) for PbBe<sub>2</sub>B<sub>2</sub>O<sub>6</sub>.

|                     |           |                     |           |
|---------------------|-----------|---------------------|-----------|
| Be(1)–O(1)#4        | 1.664(14) | O(2)–Be(1)–O(3)     | 128.9(8)  |
| Be(1)–O(2)          | 1.409(13) | O(2)–Be(1)–O(1)#4   | 116.3(6)  |
| Be(1)–O(3)          | 1.495(10) | O(3)–Be(1)–O(1)#4   | 113.8 (7) |
| B(1)–O(1)           | 1.275(12) | O(1)–B(1)–O(2)#6    | 107.6(16) |
| B(1)–O(2)#6         | 1.379(10) | O(1)–B(1)–O(3)#7    | 132.8(17) |
| B(1)–O(3)#7         | 1.385(10) | O(2)#6–B(1)–O(3)#7  | 119.3(6)  |
| Pb(1)–O(2)          | 2.373(6)  | O(2)–Pb(1)–O(2)#1   | 73.8(3)   |
| Pb(1)–O(2)#1        | 2.373(6)  | O(2)–Pb(1)–O(1)#2   | 90.2(3)   |
| Pb(1)–O(1)#2        | 2.69(3)   | O(2)–Pb(1)–O(1)#3   | 49.5(3)   |
| Pb(1)–O(1)#3        | 2.69(3)   | O(2)#1–Pb(1)–O(1)#3 | 49.5(3)   |
| O(2)#1–Pb(1)–O(1)#2 | 90.2(3)   | O(1)#2–Pb(1)–O(1)#3 | 65.9(8)   |

Symmetry transformations used to generate equivalent atoms:

#1  $-x, y, z$ ; #2  $-x, y, z-1$ ; #3  $x, y, z-1$ ; #4  $x-1/2, -y-2, z-1/2$ ; #5  $-x-1/2, -y-3, z+1/2$ ;

#6  $-x, y, z+1$ ; #7  $x+1/2, -y-3, z+1/2$

**Table S5.** Optical properties of reported UV NLO BeO<sub>4</sub>-containing beryllium borates and PbBe<sub>2</sub>B<sub>2</sub>O<sub>6</sub>.

| Compounds                                                                             | Space group                    | SHG response | Birefringence        | UV cutoff edge (nm) | Ref. |
|---------------------------------------------------------------------------------------|--------------------------------|--------------|----------------------|---------------------|------|
| KBe <sub>2</sub> BO <sub>3</sub> F <sub>2</sub>                                       | <i>R32</i>                     | 1.2 × KDP    | Exp. 0.077 @1064 nm  | Exp. 147            | 75   |
| NaBe <sub>2</sub> BO <sub>3</sub> F <sub>2</sub>                                      | <i>C2</i>                      | 1.4 × KDP    | Cal. 0.091 @ 200 nm  | Exp. 155            | 76   |
| RbBe <sub>2</sub> BO <sub>3</sub> F <sub>2</sub>                                      | <i>R32</i>                     | 1.15 × KDP   | Exp. 0.073 @1064 nm  | Exp. 160            | 77   |
| CsBe <sub>2</sub> BO <sub>3</sub> F <sub>2</sub>                                      | <i>R32</i>                     | 1.28 × KDP   | Exp. 0.058 @ 1064 nm | Exp. 151            | 77   |
| TlBe <sub>2</sub> BO <sub>3</sub> F <sub>2</sub>                                      | <i>R32</i>                     | 1.0 × KDP    | Not reported         | Exp. < 200          | 78   |
| NH <sub>4</sub> Be <sub>2</sub> BO <sub>3</sub> F <sub>2</sub>                        | <i>R32</i>                     | 1.2 × KDP    | Exp. 0.072 @ 1064 nm | Exp. 153            | 79   |
| α-Be <sub>2</sub> BO <sub>3</sub> F                                                   | <i>C2</i>                      | 0.3 × KDP    | Not reported         | Exp. < 186          | 80   |
| γ-Be <sub>2</sub> BO <sub>3</sub> F                                                   | <i>R32</i>                     | 2.3 × KDP    | Cal. 0.099 @ 1064 nm | Cal. 144.8          | 79   |
| NaBeB <sub>3</sub> O <sub>6</sub>                                                     | <i>Pna2<sub>1</sub></i>        | 1.60 × KDP   | Cal. 0.080 @ 400 nm  | Exp. < 200          | 81   |
| Na <sub>2</sub> Be <sub>4</sub> B <sub>4</sub> O <sub>11</sub>                        | <i>P1</i>                      | 1.3 × KDP    | Cal. 0.047 @ 400 nm  | Exp. 171            | 82   |
| β-KBe <sub>2</sub> B <sub>3</sub> O <sub>7</sub>                                      | <i>Pmn2<sub>1</sub></i>        | 0.75 × KDP   | Cal. 0.038 @ 400 nm  | Cal. 187            | 82   |
| γ-KBe <sub>2</sub> B <sub>3</sub> O <sub>7</sub>                                      | <i>P2<sub>1</sub></i>          | 0.68 × KDP   | Cal. 0.059 @400 nm   | Cal. 186            | 82   |
| RbBe <sub>2</sub> B <sub>3</sub> O <sub>7</sub>                                       | <i>Pmn2<sub>1</sub></i>        | 0.79 × KDP   | Cal. 0.038 @ 400 nm  | Cal. 179            | 82   |
| LiNa <sub>5</sub> Be <sub>12</sub> B <sub>12</sub> O <sub>33</sub>                    | <i>Pc</i>                      | 1.4 × KDP    | Cal. 0.046 @ 400 nm  | Exp. 169            | 82   |
| Na <sub>2</sub> CsBe <sub>6</sub> B <sub>5</sub> O <sub>15</sub>                      | <i>C2</i>                      | 1.17 × KDP   | Cal. 0.015 @ 400 nm  | Cal. 192            | 83   |
| Sr <sub>2</sub> Be <sub>2</sub> B <sub>2</sub> O <sub>7</sub> (SBBO)                  | <i>P<math>\bar{6}c2</math></i> | 3.8 × KDP    | Exp. 0.062 @ 1064 nm | Exp. 155            | 84   |
| Ba <sub>2</sub> Be <sub>2</sub> B <sub>2</sub> O <sub>7</sub>                         | <i>P<math>\bar{6}c2</math></i> | 2.0 × KDP    | Not reported         | Exp. 175            | 85   |
| BaBe <sub>2</sub> BO <sub>3</sub> F <sub>3</sub>                                      | <i>P6<sub>3</sub></i>          | 0.3 × KDP    | Cal. 0.051 @ 800 nm  | Exp. < 185          | 86   |
| Sr <sub>3</sub> Be <sub>1.9</sub> B <sub>5.1</sub> O <sub>12.1</sub> F <sub>0.9</sub> | <i>R3m</i>                     | 2.2 × KDP    | Cal. 0.051 @ 800 nm  | Exp. < 200          | 87   |
| LiSr <sub>3</sub> Be <sub>3</sub> B <sub>3</sub> O <sub>9</sub> F <sub>4</sub>        | <i>R3m</i>                     | 2.2 × KDP    | Cal. 0.045 @ 1064 nm | Exp. 175            | 88   |
| NaSr <sub>3</sub> Be <sub>3</sub> B <sub>3</sub> O <sub>9</sub> F <sub>4</sub>        | <i>R3m</i>                     | 3.0 × KDP    | Exp. 0.056 @ 1064 nm | Exp. 170            | 89   |

|                                                                         |                                |                   |                            |                 |                  |
|-------------------------------------------------------------------------|--------------------------------|-------------------|----------------------------|-----------------|------------------|
| NaCaBe <sub>2</sub> B <sub>2</sub> O <sub>6</sub> F                     | <i>Cc</i>                      | 0.3 × KDP         | Cal. 0.058 @ 400 nm        | Exp. 185        | 90               |
| YBe <sub>2</sub> B <sub>5</sub> O <sub>11</sub>                         | <i>Pna2<sub>1</sub></i>        | 0.9 × KDP         | Not reported               | Exp. < 200      | 91               |
| GdBe <sub>2</sub> B <sub>5</sub> O <sub>11</sub>                        | <i>Pna2<sub>1</sub></i>        | 1.1 × KDP         | Not reported               | Exp. < 200      | 92               |
| LaBeB <sub>3</sub> O <sub>7</sub>                                       | <i>Pmn2<sub>1</sub></i>        | 1.1 × KDP         | Not reported               | Exp. 220        | 93               |
| Sr <sub>2</sub> Pb(BeB <sub>5</sub> O <sub>10</sub> )(BO <sub>3</sub> ) | <i>R3m</i>                     | 8.0 × KDP         | Cal. 0.10 @ 1064 nm        | Exp. 280        | 94               |
| <b>PbBe<sub>2</sub>B<sub>2</sub>O<sub>6</sub></b>                       | <b><i>Pmn2<sub>1</sub></i></b> | <b>18.5 × KDP</b> | <b>Exp. 0.171 @ 590 nm</b> | <b>Exp. 249</b> | <b>This work</b> |

**Table S6.** Optical properties of the main UV NLO borates, carbonates and nitrates.

| Compounds                                                       | Space group                                     | SHG response | Birefringence      | Exp. UV cutoff edge (nm) | Ref. |
|-----------------------------------------------------------------|-------------------------------------------------|--------------|--------------------|--------------------------|------|
| LiB <sub>3</sub> O <sub>5</sub>                                 | <i>Pnc2</i>                                     | 2.6 × KDP    | Exp. 0.045@1064 nm | 160                      | 95   |
| CsB <sub>3</sub> O <sub>5</sub>                                 | <i>P2<sub>1</sub>2<sub>1</sub>2<sub>1</sub></i> | 2.0 × KDP    | Exp. 0.059@1064 nm | 170                      | 96   |
| CsLiB <sub>6</sub> O <sub>10</sub>                              | <i><math>\bar{1}A2d</math></i>                  | 3.0 × KDP    | Exp. 0.049@1064 nm | 180                      | 97   |
| $\beta$ -BaB <sub>2</sub> O <sub>4</sub>                        | <i>R3c</i>                                      | 5.5 × KDP    | Exp. 0.113@1064 nm | 189                      | 98   |
| BiB <sub>3</sub> O <sub>6</sub>                                 | <i>C2</i>                                       | 8.2 × KDP    | Exp. 0.16@1064nm   | 286                      | 99   |
| Li <sub>4</sub> Sr(BO <sub>3</sub> ) <sub>2</sub>               | <i>Cc</i>                                       | 2.0 × KDP    | Cal. 0.056@532 nm  | 186                      | 100  |
| KSr <sub>4</sub> (BO <sub>3</sub> ) <sub>3</sub>                | <i>Ama2</i>                                     | 1.0 × KDP    | Cal. 0.029@1064 nm | 300                      | 101  |
| LiNaB <sub>4</sub> O <sub>7</sub>                               | <i>Fdd2</i>                                     | 0.2 × KDP    | Not reported       | 180                      | 102  |
| Li <sub>4</sub> Rb <sub>3</sub> B <sub>7</sub> O <sub>14</sub>  | <i>P3<sub>1</sub>21</i>                         | 0.7 × KDP    | Not reported       | < 190                    | 103  |
| Li <sub>4</sub> Cs <sub>3</sub> B <sub>7</sub> O <sub>14</sub>  | <i>P3<sub>1</sub>21</i>                         | 0.5 × KDP    | Not reported       | < 190                    | 104  |
| Li <sub>6</sub> Rb <sub>5</sub> B <sub>11</sub> O <sub>22</sub> | <i>C2</i>                                       | 0.7 × KDP    | Not reported       | < 190                    | 105  |
| Li <sub>3</sub> Cs <sub>2</sub> B <sub>5</sub> O <sub>10</sub>  | <i>C222<sub>1</sub></i>                         | 0.5 × KDP    | Not reported       | 175                      | 106  |
| Li <sub>5</sub> Cs <sub>2</sub> B <sub>7</sub> O <sub>14</sub>  | <i>Ama2</i>                                     | 0.2 × KDP    | Not reported       | < 200                    | 107  |
| NaCa <sub>4</sub> (BO <sub>3</sub> ) <sub>3</sub>               | <i>Ama2</i>                                     | 0.5 × KDP    | Not reported       | 300                      | 108  |
| KCa <sub>4</sub> (BO <sub>3</sub> ) <sub>3</sub>                | <i>Ama2</i>                                     | 0.3 × KDP    | Not reported       | 300                      | 108  |



|                                      |                                |                  |                     |       |     |
|--------------------------------------|--------------------------------|------------------|---------------------|-------|-----|
| $K_{0.59}Rb_{0.41}Ca_4B_3O_9$        | <i>Ama2</i>                    | $0.4 \times KDP$ | Cal.0.036@1064 nm   | <200  | 109 |
| $KMgBO_3$                            | <i>P2_13</i>                   | $0.3 \times KDP$ | Not reported        | 185   | 110 |
| $Al_5BO_9$                           | <i>Cmc2_1</i>                  | $0.2 \times KDP$ | Cal. 0.02@1064 nm   | 202   | 111 |
| $K_2Al_2B_2O_7$                      | <i>P321</i>                    | $1.0 \times KDP$ | Exp. 0.074@589 nm   | 180   | 112 |
| $\beta\text{-}Rb_2Al_2B_2O_7$        | <i>P321</i>                    | $2.0 \times KDP$ | Not reported        | < 200 | 113 |
| $Cs_2Al_2(B_3O_6)_2O$                | <i>P6_3</i>                    | $0.5 \times KDP$ | Cal. 0.136@177.3 nm | < 185 | 114 |
| $Cs_2AlB_5O_{10}$                    | <i>P3_12_1</i>                 | $0.8 \times KDP$ | Cal 0.035@1064 nm   | <190  | 115 |
| $K_{0.67}Rb_{1.33}Al_2B_2O_7$        | <i>P321</i>                    | $0.9 \times KDP$ | Cal. 0.054@177.3 nm | 188   | 116 |
| $YAl_3(BO_3)_4$                      | <i>R32</i>                     | $4.4 \times KDP$ | Exp. 0.07@ 1064 nm  | 170   | 117 |
| $K_2Ba_4Ga_4Li_2B_6O_{21}$           | <i>P<math>\bar{6}</math>2c</i> | $0.5 \times KDP$ | Not reported        | 226   | 118 |
| $BiAlGa_2(BO_3)_4$                   | <i>R32</i>                     | $4.0 \times KDP$ | Not reported        | 271   | 119 |
| $YCa_4O(BO_3)_3$                     | <i>Cm</i>                      | $3.0 \times KDP$ | Exp. 0.043@ 589 nm  | 200   | 120 |
| $Na_3Gd_2(BO_3)_3$                   | <i>Amm2</i>                    | $1.3 \times KDP$ | Exp. 0.02@1064 nm   | 207   | 121 |
| $Na_3La_9O_3(BO_3)_8$                | <i>P<math>\bar{6}</math>2m</i> | $6.0 \times KDP$ | Exp. 0.085@ 1064 nm | 270   | 122 |
| $K_3ScB_6O_{12}$                     | <i>R32</i>                     | $1.3 \times KDP$ | Not Report          | 274   | 123 |
| $La_2SrB_{10}O_{19}$                 | <i>C2</i>                      | $2.0 \times KDP$ | Cal. 0.031@1064 nm  | <250  | 124 |
| $Rb_3YB_6O_{12}$                     | <i>R32</i>                     | $0.8 \times KDP$ | Not reported        | <200  | 125 |
| $BaYOBO_3$                           | <i>P<math>\bar{6}</math>2m</i> | $2.6 \times KDP$ | Not Report          | 190   | 126 |
| $K_5Mg_2La_3(BO_3)_6$                | <i>P3_1m</i>                   | $3.1 \times KDP$ | Not Report          | <200  | 127 |
| $Rb_7SrY_2(B_5O_{10})_3$             | <i>R32</i>                     | $0.9 \times KDP$ | Cal. 0.003@1064 nm  | <300  | 128 |
| $Y_{0.57}La_{0.72}Sc_{2.71}(BO_3)_4$ | <i>R32</i>                     | $3.6 \times KDP$ | Not reported        | < 200 | 129 |
| $Rb_7SrGd_2(B_5O_{10})_3$            | <i>R32</i>                     | $0.5 \times KDP$ | Not reported        | <225  | 130 |
| $K_6NaSrSc_2B_{15}O_{30}$            | <i>R32</i>                     | $0.7 \times KDP$ | Cal. 0.02@1064 nm   | 248   | 131 |
| $Cs_3Zn_6B_9O_{21}$                  | <i>Cmc2_1</i>                  | $3.3 \times KDP$ | Cal. 0.062@532 nm   | < 200 | 132 |

|                                                                                  |              |                         |                    |       |     |
|----------------------------------------------------------------------------------|--------------|-------------------------|--------------------|-------|-----|
| $\text{Ba}_2\text{Zn}(\text{BO}_3)_2$                                            | $Pca2_1$     | $4.5 \times \text{KDP}$ | Not reported       | 230   | 133 |
| $\text{Ba}_5\text{Zn}_4(\text{BO}_3)_6$                                          | $Pc$         | $2.6 \times \text{KDP}$ | Not reported       | 223   | 134 |
| $(\text{NH}_4)_2\text{B}_4\text{SO}_{10}$                                        | $C2$         | $1.1 \times \text{KDP}$ | Cal. 0.053@1064 nm | 252   | 135 |
| $\text{RbZn}_2(\text{BO}_3)\text{Si}_2\text{O}_5$                                | $Cmc2_1$     | $0.4 \times \text{KDP}$ | Cal. 0.021@1064 nm | <190  | 136 |
| $\text{CsZn}_2(\text{BO}_3)\text{Si}_2\text{O}_5$                                | $Cmc2_1$     | $0.8 \times \text{KDP}$ | Cal. 0.022@1064 nm | <190  | 136 |
| $\text{K}_3\text{B}_6\text{O}_{10}\text{NO}_3$                                   | $P3_121$     | $0.8 \times \text{KDP}$ | Cal. 0.046@1064 nm | 216   | 137 |
| $\text{K}_7\text{CaBi}_2\text{B}_{15}\text{O}_{30}$                              | $R32$        | $0.6 \times \text{KDP}$ | Not reported       | 282   | 138 |
| $\beta\text{-Zn}_3\text{BPO}_7$                                                  | $P\bar{6}$   | $1.5 \times \text{KDP}$ | Exp. 0.03@1064 nm  | 250   | 139 |
| $\text{Cd}_3\text{BPO}_7$                                                        | $Pna2_1$     | $2.2 \times \text{KDP}$ | Not reported       | 281   | 140 |
| $\text{Ba}_3(\text{ZnB}_5\text{O}_{10})\text{PO}_4$                              | $Pmn2_1$     | $4.0 \times \text{KDP}$ | Cal. 0.035@532 nm  | 180   | 141 |
| $\text{LiPbB}_9\text{O}_{15}$                                                    | $R3c$        | $1.0 \times \text{KDP}$ | Not reported       | 261   | 142 |
| $\text{Pb}_4\text{O}(\text{BO}_3)_2$                                             | $Aba2$       | $3.0 \times \text{KDP}$ | Cal. 0.045@532 nm  | 280   | 143 |
| $\text{Pb}_4\text{B}_6\text{O}_{13}$                                             | $Cc$         | $3.0 \times \text{KDP}$ | Not reported       | 290   | 144 |
| $\text{Be}_2(\text{BO}_3)(\text{IO}_3)$                                          | $Pmc2_1$     | $7.2 \times \text{KDP}$ | Cal. 0.172@1064 nm | 245   | 145 |
| $\text{Zn}_2\text{BO}_3(\text{OH})$                                              | $P2_1$       | $1.5 \times \text{KDP}$ | Exp. 0.067@800 nm  | 204   | 146 |
| $\text{Li}(\text{H}_2\text{O})_4\text{B}(\text{OH})_4 \cdot 2\text{H}_2\text{O}$ | $P3$         | $0.8 \times \text{KDP}$ | Not reported       | 262   | 147 |
| $\text{Na}[\text{B}_5\text{O}_7(\text{OH})_2](\text{H}_2\text{O})$               | $Pca2_1$     | $0.1 \times \text{KDP}$ | Not reported       | 221   | 148 |
| $\text{Na}_2\text{B}_5\text{O}_8(\text{OH}) \cdot 2\text{H}_2\text{O}$           | $Pna2_1$     | $0.5 \times \text{KDP}$ | Not reported       | < 190 | 149 |
| $\text{Na}_2\text{B}_9\text{O}_{15}(\text{H}_2\text{O})(\text{H}_3\text{O})$     | $P2_1$       | $1.0 \times \text{KDP}$ | Not reported       | 286   | 150 |
| $\text{K}_3\text{B}_3\text{O}_4(\text{OH})_4 \cdot 2\text{H}_2\text{O}$          | $Cmc2_1$     | $0.8 \times \text{KDP}$ | Not reported       | < 190 | 151 |
| $\text{K}_2\text{B}_5\text{O}_8(\text{OH}) \cdot 2\text{H}_2\text{O}$            | $Pna2_1$     | $0.8 \times \text{KDP}$ | Cal.0.024@1064 nm  | <200  | 152 |
| $\text{K}_2[\text{B}_4\text{O}_5(\text{OH})_4] \cdot 2\text{H}_2\text{O}$        | $P2_12_12_1$ | $0.5 \times \text{KDP}$ | Cal. 0.016@1064 nm | 180   | 153 |
| $\text{Mg}[\text{B}_6\text{O}_9(\text{OH})_2] \cdot 4\text{H}_2\text{O}$         | $Pna2_1$     | $1.1 \times \text{KDP}$ | Not reported       | < 200 | 154 |
| $\text{Ca}_2\text{B}_{11}\text{O}_{16}(\text{OH})_5 \cdot \text{H}_2\text{O}$    | $P2_1$       | $1.3 \times \text{KDP}$ | Not reported       | 223   | 155 |

|                                                                                               |                                |                         |                    |       |     |
|-----------------------------------------------------------------------------------------------|--------------------------------|-------------------------|--------------------|-------|-----|
| $\text{Ca}_2\text{B}_5\text{O}_9(\text{OH})\cdot\text{H}_2\text{O}$                           | <i>Cc</i>                      | $3.0 \times \text{KDP}$ | Not reported       | 228   | 156 |
| $\text{Sr}_2\text{B}_5\text{O}_9(\text{OH})\cdot\text{H}_2\text{O}$                           | <i>C2</i>                      | $3.0 \times \text{KDP}$ | Not reported       | < 190 | 157 |
| $\text{Sr}_4\text{B}_{10}\text{O}_{18}(\text{OH})_2\cdot 2\text{H}_2\text{O}$                 | <i>P1</i>                      | $2.0 \times \text{KDP}$ | Not reported       | < 190 | 158 |
| $\text{Ba}_2[\text{B}_6\text{O}_9(\text{OH})_4]$                                              | <i>P2_1</i>                    | $3.0 \times \text{KDP}$ | Not reported       | < 190 | 159 |
| $\text{Ba}_2[\text{B}_4\text{O}_7(\text{OH})_2]$                                              | <i>P3_121</i>                  | $2.2 \times \text{KDP}$ | Not reported       | 242   | 160 |
| $\text{Ba}_2\text{B}_9\text{O}_{12}(\text{OH})_7\cdot 4\text{H}_2\text{O}$                    | <i>Pmn2_1</i>                  | $0.8 \times \text{KDP}$ | Not reported       | 230   | 161 |
| $\text{Ba}_3(\text{B}_{10}\text{O}_{16})(\text{OH})_4$                                        | <i>P31c</i>                    | $1.1 \times \text{KDP}$ | Not reported       | 243   | 162 |
| $\text{Ba}_2\text{B}_{11}\text{O}_{16}(\text{OH})_5\cdot\text{H}_2\text{O}$                   | <i>P2_1</i>                    | $1.2 \times \text{KDP}$ | Not reported       | <200  | 163 |
| $\text{Ba}_3\text{Al}_2\text{B}_{10}\text{O}_{19}(\text{OH})_4$                               | <i>Fdd2</i>                    | $3.0 \times \text{KDP}$ | Not reported       | 230   | 164 |
| $\text{Ba}_3\text{Ga}_2\text{B}_{10}\text{O}_{19}(\text{OH})_4$                               | <i>Fdd2</i>                    | $3.0 \times \text{KDP}$ | Not reported       | 248   | 164 |
| $\text{LiK}[\text{B}_5\text{O}_8(\text{OH})]\cdot 1.5\text{H}_2\text{O}$                      | <i>C222_1</i>                  | $1.3 \times \text{KDP}$ | Not reported       | <200  | 165 |
| $\text{Na}_{0.33}\text{K}_{1.67}(\text{B}_4\text{O}_5)(\text{OH})_4\cdot 3\text{H}_2\text{O}$ | <i>P<math>\bar{6}</math>2c</i> | $0.9 \times \text{KDP}$ | Not reported       | 242   | 166 |
| $\text{Li}_2\text{CsB}_7\text{O}_{10}(\text{OH})_4$                                           | <i>C222</i>                    | $2.5 \times \text{KDP}$ | Cal. 0.06@1064 nm  | <190  | 167 |
| $\text{Li}_{0.5}\text{Ca}_{0.5}\text{B}_{3.5}\text{O}_{5.5}(\text{OH})$                       | <i>P3_221</i>                  | $1.6 \times \text{KDP}$ | Not Report         | 213   | 168 |
| $\text{NaSr}_3\text{B}_{10}\text{O}_{16}(\text{OH})_5$                                        | <i>P3_1c</i>                   | $3.3 \times \text{KDP}$ | Cal. 0.039@1064 nm | <190  | 169 |
| $\text{Cs}_2\text{CaB}_8\text{O}_{10}(\text{OH})_8\cdot 8\text{H}_2\text{O}$                  | <i>P2_12_12_1</i>              | $0.5 \times \text{KDP}$ | Not reported       | 190   | 170 |
| $\text{K}_2\text{BaB}_8\text{O}_{10}(\text{OH})_8\cdot 10\text{H}_2\text{O}$                  | <i>Pna2_1</i>                  | $0.5 \times \text{KDP}$ | Not reported       | < 200 | 171 |
| $\text{LiBa}_3(\text{OH})(\text{B}_{10}\text{O}_{16})(\text{OH})_5$                           | <i>P31c</i>                    | $1.2 \times \text{KDP}$ | Not reported       | < 200 | 172 |
| $\text{NaPb}_4\text{B}_{11}\text{O}_{21}\cdot\text{H}_2\text{O}$                              | <i>Pnn2</i>                    | $2.0 \times \text{KDP}$ | Not reported       | < 220 | 173 |
| $\text{Ba}_{2.16}\text{Pb}_{0.84}\text{B}_{10}\text{O}_{16}(\text{OH})_4$                     | <i>P31c</i>                    | $1.2 \times \text{KDP}$ | Not reported       | 266   | 162 |
| $\text{Ba}_2\text{B}_5\text{O}_9\text{Cl}\cdot 0.5\text{H}_2\text{O}$                         | <i>Pnn2</i>                    | $1.0 \times \text{KDP}$ | Not reported       | 225   | 174 |
| $\text{Zn}_2\text{BO}_3\text{X}\cdot\text{H}_2\text{O}$ (X = Cl, Br)                          | <i>P2_12_12_1</i>              | $0.6 \times \text{KDP}$ | Not reported       | <210  | 175 |
| $\text{NH}_4\text{B}_4\text{O}_6\text{F}$                                                     | <i>Pna2_1</i>                  | $3.0 \times \text{KDP}$ | Exp. 0.117@1064 nm | 156   | 176 |

|                                                                |                                |                         |                    |       |     |
|----------------------------------------------------------------|--------------------------------|-------------------------|--------------------|-------|-----|
| $\text{Li}_2\text{B}_6\text{O}_9\text{F}_2$                    | <i>Cc</i>                      | $0.9 \times \text{KDP}$ | Cal. 0.07@1064 nm  | < 190 | 177 |
| $\text{Ca}_5(\text{BO}_3)_3\text{F}$                           | <i>Cm</i>                      | $2.0 \times \text{KDP}$ | Exp. 0.05@1064 nm  | 190   | 178 |
| $\text{RbB}_4\text{O}_6\text{F}$                               | <i>Pna2_1</i>                  | $0.8 \times \text{KDP}$ | Exp. 0.102@1064 nm | < 190 | 179 |
| $\text{K}_{10}\text{B}_{13}\text{O}_{15}\text{F}_{19}$         | <i>R3m</i>                     | $0.4 \times \text{KDP}$ | Cal. 0.03@1064 nm  | < 190 | 180 |
| $\text{Rb}_{10}\text{B}_{13}\text{O}_{15}\text{F}_{19}$        | <i>R3m</i>                     | $0.5 \times \text{KDP}$ | Cal. 0.026@1064 nm | < 190 | 180 |
| $\text{CsB}_4\text{O}_6\text{F}$                               | <i>Pna2_1</i>                  | $1.9 \times \text{KDP}$ | Exp. 0.114@1064 nm | 155   | 181 |
| $\text{CsKB}_8\text{O}_{12}\text{F}_2$                         | <i>P321</i>                    | $1.9 \times \text{KDP}$ | Cal. 0.105@1064 nm | < 190 | 179 |
| $\text{CaB}_5\text{O}_7\text{F}_3$                             | <i>Cmc2_1</i>                  | $2.0 \times \text{KDP}$ | Exp. 0.072@546 nm  | < 180 | 182 |
| $\text{SrB}_5\text{O}_7\text{F}_3$                             | <i>Cmc2_1</i>                  | $1.6 \times \text{KDP}$ | Cal. 0.072@589 nm  | < 180 | 183 |
| $\text{Sr}_3\text{B}_6\text{O}_{11}\text{F}_2$                 | <i>P2_1</i>                    | $2.5 \times \text{KDP}$ | Not reported       | < 190 | 184 |
| $\text{Ba}_3\text{B}_6\text{O}_{11}\text{F}_2$                 | <i>P2_1</i>                    | $3.0 \times \text{KDP}$ | Not reported       | < 200 | 185 |
| $\text{Ba}_4\text{B}_{11}\text{O}_{20}\text{F}$                | <i>Cmc2_1</i>                  | $10 \times \text{KDP}$  | Cal.0.0146@1064 nm | 175   | 186 |
| $\text{PbB}_5\text{O}_7\text{F}_3$                             | <i>Cmc2_1</i>                  | $6.0 \times \text{KDP}$ | Cal. 0.12@1064 nm  | 225   | 187 |
| $\text{Li}_3\text{Ca}_9(\text{BO}_3)_7 \cdot 2[\text{LiF}]$    | <i>P1</i>                      | $1.0 \times \text{KDP}$ | Cal. 0.07@532nm    | 230   | 188 |
| $\beta\text{-BaCaBO}_3\text{F}$                                | <i><math>P\bar{6}2m</math></i> | $0.7 \times \text{KDP}$ | Exp. 0.047@1064 nm | 210   | 189 |
| $\text{BaMgBO}_3\text{F}$                                      | <i>Cc</i>                      | $0.1 \times \text{KDP}$ | Cal. 0.058@1064 nm | 190   | 190 |
| $\text{Ba}_3\text{Sr}_4(\text{BO}_3)_3\text{F}_5$              | <i>P6_3mc</i>                  | $0.5 \times \text{KDP}$ | Not reported       | 210   | 191 |
| $\text{Rb}_3\text{Al}_3\text{B}_3\text{O}_{10}\text{F}$        | <i>P3_1c</i>                   | $1.2 \times \text{KDP}$ | Not reported       | <200  | 192 |
| $\text{BaAlBO}_3\text{F}_2$                                    | <i><math>P\bar{6}2c</math></i> | $2.0 \times \text{KDP}$ | Not reported       | 165   | 193 |
| $\text{BaAl}_{0.61}\text{Ga}_{0.39}\text{BO}_3\text{F}_2$      | <i><math>P\bar{6}2c</math></i> | $2.0 \times \text{KDP}$ | Not reported       | 265   | 194 |
| $\text{CsAlB}_3\text{O}_6\text{F}$                             | <i>Pna2_1</i>                  | $2.0 \times \text{KDP}$ | Cal. 0.091@532 nm  | < 190 | 195 |
| $\text{RbAlB}_3\text{O}_6\text{F}$                             | <i>Pna2_1</i>                  | $0.2 \times \text{KDP}$ | Cal 0.095@1064 nm  | <200  | 196 |
| $\text{Cs}_{0.5}\text{Rb}_{0.5}\text{AlB}_3\text{O}_6\text{F}$ | <i><math>P\bar{6}2c</math></i> | $2 \times \text{KDP}$   | Not Report         | <200  | 196 |

|                                |              |                  |                     |       |     |
|--------------------------------|--------------|------------------|---------------------|-------|-----|
| $K_3Ba_3Li_2Al_4B_6O_{20}F$    | $P\bar{6}2c$ | $1.5 \times KDP$ | Cal. 0.052@532 nm   | 190   | 197 |
| $Rb_3Ba_3Li_2Al_4B_6O_{20}F$   | $P\bar{6}2c$ | $1.4 \times KDP$ | Cal. 0.057@1064nm   | 195   | 198 |
| $K_3Sr_3Li_2Al_4B_6O_{20}F$    | $R32$        | $1.7 \times KDP$ | Exp.0.0574@1064 nm  | 190   | 199 |
| $CsZn_2BO_3F_2$                | $R32$        | $3.2 \times KDP$ | Not Report          | <190  | 200 |
| $CsZn_2BO_3Cl_2$               | $R32$        | $2.8 \times KDP$ | Not Report          | <190  | 200 |
| $CsZn_2BO_3FCl$                | $R3$         | $3.5 \times KDP$ | Not Report          | <190  | 201 |
| $BaZnBO_3F$                    | $P\bar{6}$   | $2.8 \times KDP$ | Not reported        | 223   | 202 |
| $Cd_5(BO_3)_3F$                | $Cm$         | $3.8 \times KDP$ | Not reported        | 282   | 203 |
| $PbB_2O_3F_2$                  | $P3_1m$      | $13 \times KDP$  | Not reported        | 220   | 204 |
| $Pb_3B_6O_{11}F_2$             | $P2_1$       | $4.0 \times KDP$ | Cal. 0.071 @ 532 nm | 240   | 205 |
| $K_3B_6O_{10}Cl$               | $R3m$        | $4.0 \times KDP$ | Exp. 0.047@ 800 nm  | 180   | 206 |
| $K_3B_6O_{10}Br$               | $R3m$        | $3.0 \times KDP$ | Not reported        | 184   | 207 |
| $K_{2.33}Na_{0.67}B_6O_{10}Br$ | $R3m$        | $2.8 \times KDP$ | Not reported        | < 190 | 208 |
| $K_{2.87}Na_{0.13}B_6O_{10}Br$ | $R3m$        | $2.8 \times KDP$ | Not reported        | < 190 | 208 |
| $Ca_2B_5O_9Cl$                 | $Pnn2$       | $0.8 \times KDP$ | Exp.0.0184@546 nm   | 170   | 209 |
| $Sr_2B_5O_9Cl$                 | $Pnn2$       | $0.5 \times KDP$ | Exp.0.0149@546 nm   | 170   | 209 |
| $NaBa_4(AlB_4O_9)_2Cl_3$       | $P4_2nm$     | $1.0 \times KDP$ | Exp. 0.017@1064 nm  | 230   | 210 |
| $NaBa_4(AlB_4O_9)_2Br_3$       | $P4_2nm$     | $1.0 \times KDP$ | Exp.0.0287@532 nm   | 248   | 211 |
| $Zn_3B_7O_{13}Cl$              | $R3c$        | $2.2 \times KDP$ | Cal.0.024@1064 nm   | 190   | 212 |
| $NH_4Zn_2BO_3Cl_2$             | $R32$        | $2.8 \times KDP$ | Not reported        | 186   | 213 |
| $KZn_2BO_3Cl_2$                | $R32$        | $3.0 \times KDP$ | Not reported        | 193   | 212 |
| $RbZn_2BO_3Cl_2$               | $R32$        | $2.9 \times KDP$ | Not reported        | 198   | 213 |
| $KZn_2BO_3Br_2$                | $R32$        | $2.7 \times KDP$ | Not reported        | 206   | 213 |

|                                                                                       |                                |                         |                    |       |     |
|---------------------------------------------------------------------------------------|--------------------------------|-------------------------|--------------------|-------|-----|
| $\text{RbZn}_2\text{BO}_3\text{Br}_2$                                                 | <i>R32</i>                     | $2.5 \times \text{KDP}$ | Not reported       | 214   | 213 |
| $\text{Ba}_7(\text{BO}_3)_3(\text{SiO}_4) \text{X} (\text{X} = \text{Cl}, \text{Br})$ | <i>P6_3mc</i>                  | $1.0 \times \text{KDP}$ | Not reported       | < 190 | 214 |
| $\text{Ba}_3\text{Ca}_4(\text{BO}_3)_3(\text{SiO}_4)\text{Cl}$                        | <i>P6_3mc</i>                  | $0.6 \times \text{KDP}$ | Cal.0.03@1064 nm   | < 190 | 215 |
| $\text{Pb}_2\text{BO}_3\text{Cl}$                                                     | <i>P321</i>                    | $9.0 \times \text{KDP}$ | Cal. 0.12@1064 nm  | 300   | 216 |
| $\text{Na}_3\text{Y}(\text{CO}_3)_3$                                                  | <i>Ama2</i>                    | $3.6 \times \text{KDP}$ | Not reported       | 220   | 217 |
| $\text{Na}_3\text{Gd}(\text{CO}_3)_3$                                                 | <i>Ama2</i>                    | $3.5 \times \text{KDP}$ | Not reported       | 223   | 217 |
| $\text{Na}_4\text{La}_2(\text{CO}_3)_5$                                               | <i>P6_3mc</i>                  | $3.0 \times \text{KDP}$ | Not reported       | 235   | 218 |
| $\text{CsNa}_5\text{Ca}_5(\text{CO}_3)_8$                                             | <i>P6_3mc</i>                  | $1.0 \times \text{KDP}$ | Not reported       | 210   | 218 |
| $\text{NaZnCO}_3(\text{OH})$                                                          | <i>Pc</i>                      | $5.2 \times \text{KDP}$ | Cal. 0.114@1064 nm | 200   | 219 |
| $\text{LiZnCO}_3(\text{OH})$                                                          | <i>Pmn2_1</i>                  | $3.2 \times \text{KDP}$ | Cal. 0.147@1064 nm | 190   | 220 |
| $\text{KSrCO}_3\text{F}$                                                              | <i>P<math>\bar{6}</math>2m</i> | $3.3 \times \text{KDP}$ | Cal. 0.105@1064 nm | < 200 | 221 |
| $\text{RbSrCO}_3\text{F}$                                                             | <i>P<math>\bar{6}</math>2m</i> | $3.3 \times \text{KDP}$ | Cal. 0.102@1064 nm | < 200 | 222 |
| $\text{KCaCO}_3\text{F}$                                                              | <i>P<math>\bar{6}</math>2m</i> | $3.6 \times \text{KDP}$ | Cal. 0.112@1064 nm | < 200 | 223 |
| $\text{RbCaCO}_3\text{F}$                                                             | <i>P<math>\bar{6}</math>2m</i> | $1.1 \times \text{KDP}$ | Cal. 0.116@1064 nm | < 200 | 223 |
| $\text{CsCaCO}_3\text{F}$                                                             | <i>P<math>\bar{6}</math>2m</i> | $1.1 \times \text{KDP}$ | Cal. 0.107@1064 nm | < 200 | 223 |
| $\text{KMgCO}_3\text{F}$                                                              | <i>P<math>\bar{6}</math>2m</i> | $3.0 \times \text{KDP}$ | Not reported       | < 200 | 224 |
| $\text{RbMgCO}_3\text{F}$                                                             | <i>P<math>\bar{6}</math>2m</i> | $4.0 \times \text{KDP}$ | Not reported       | < 190 | 225 |
| $\text{Ca}_2\text{Na}_3(\text{CO}_3)_3\text{F}$                                       | <i>Cm</i>                      | $3.0 \times \text{KDP}$ | Exp. 0.082@589 nm  | 190   | 226 |
| $\text{Cs}_3\text{Ba}_4(\text{CO}_3)_3\text{F}_5$                                     | <i>P6_3mc</i>                  | $1.2 \times \text{KDP}$ | Not reported       | 210   | 227 |
| $\text{Cs}_9\text{Mg}_6(\text{CO}_3)_8\text{F}_5$                                     | <i>Pmn2_1</i>                  | $0.5 \times \text{KDP}$ | Not reported       | 208   | 228 |
| $\text{Na}_8\text{Lu}_2(\text{CO}_3)_6\text{F}_2$                                     | <i>Cc</i>                      | $4.2 \times \text{KDP}$ | Not reported       | < 200 | 229 |
| $\text{Na}_3\text{Lu}(\text{CO}_3)_2\text{F}_2$                                       | <i>Cc</i>                      | $4.2 \times \text{KDP}$ | Not reported       | < 200 | 229 |

|                                                                                  |               |            |                    |     |     |
|----------------------------------------------------------------------------------|---------------|------------|--------------------|-----|-----|
| KCdCO <sub>3</sub> F                                                             | $P\bar{6}_c2$ | 4.6 × KDP  | Not reported       | 235 | 230 |
| RbCdCO <sub>3</sub> F                                                            | $P\bar{6}_c2$ | 2.8 × KDP  | Not reported       | 233 | 230 |
| CsPbCO <sub>3</sub> F                                                            | $P\bar{6}_2m$ | 13.4 × KDP | Not reported       | 300 | 231 |
| Y <sub>8</sub> O(OH) <sub>15</sub> (CO <sub>3</sub> ) <sub>3</sub> Cl            | $P6_3$        | 2.5 × KDP  | Cal. 0.074@1064 nm | 235 | 232 |
| Ba <sub>2</sub> (OH) <sub>3</sub> NO <sub>3</sub>                                | $P\bar{6}_2m$ | 4.0 × KDP  | Exp. 0.080@532 nm  | 200 | 233 |
| Sr <sub>2</sub> (OH) <sub>3</sub> NO <sub>3</sub>                                | $P\bar{6}_2m$ | 3.6 × KDP  | Not reported       | 200 | 234 |
| La(OH) <sub>2</sub> NO <sub>3</sub>                                              | $P2_1$        | 5.0 × KDP  | Not reported       | 260 | 235 |
| Y(OH) <sub>2</sub> NO <sub>3</sub>                                               | $P2_1$        | 5.5 × KDP  | Not reported       | 257 | 235 |
| Gd(OH) <sub>2</sub> NO <sub>3</sub>                                              | $P2_1$        | 5.6 × KDP  | Not reported       | 256 | 235 |
| Rb <sub>2</sub> Na(NO <sub>3</sub> ) <sub>3</sub>                                | $Pmc2_1$      | 5.0 × KDP  | Not reported       | 270 | 236 |
| La(IO <sub>3</sub> ) <sub>2</sub> (NO <sub>3</sub> )                             | $P3_121$      | 0.6 × KDP  | Not reported       | 290 | 237 |
| Sc(IO <sub>3</sub> ) <sub>2</sub> (NO <sub>3</sub> )                             | $R32$         | 4.0 × KDP  | Exp. 0.348@546 nm  | 298 | 238 |
| Pb <sub>2</sub> (NO <sub>3</sub> ) <sub>2</sub> (H <sub>2</sub> O)F <sub>2</sub> | $Amm2$        | 12 × KDP   | Cal. 0.23@1064 nm  | 300 | 239 |

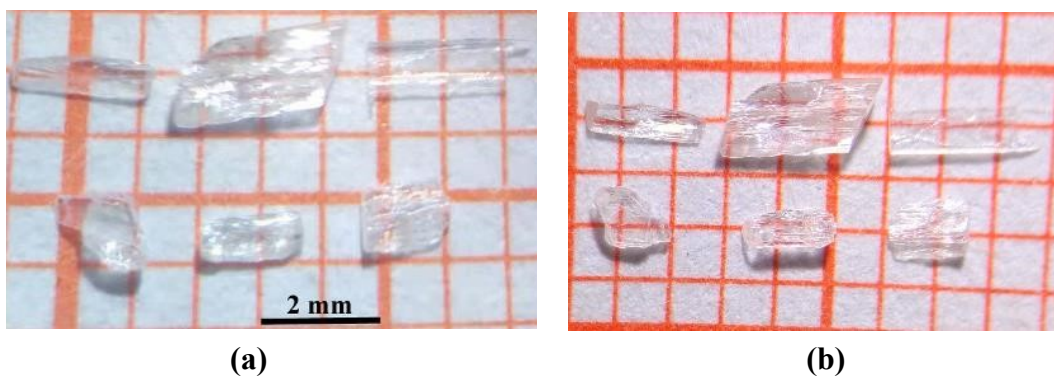

**Figure S1.** The single-crystals of  $\text{PbBe}_2\text{B}_2\text{O}_6$  (a) before being soaked in distilled water, and (b) after being soaked in distilled water for two months.



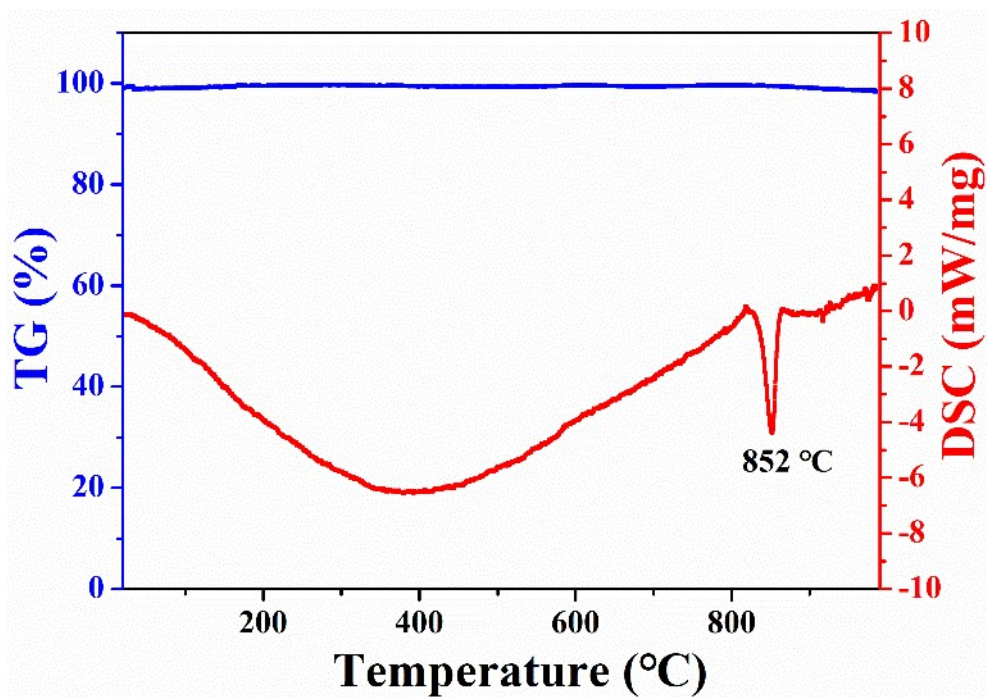

**Figure S2.** TG and DSC curves of  $\text{PbBe}_2\text{B}_2\text{O}_6$ .

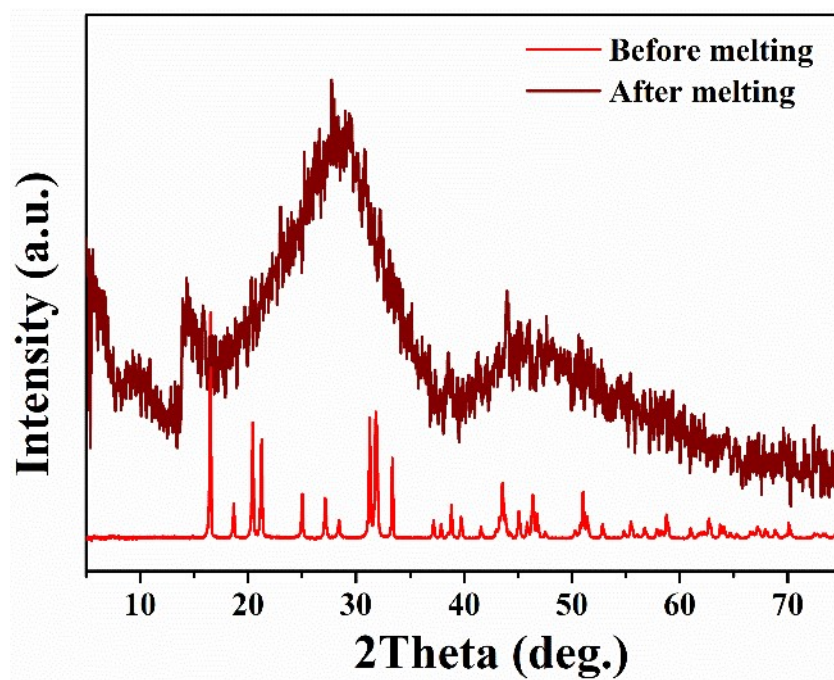

Figure S3. Powder XRD patterns of  $\text{PbBe}_2\text{B}_2\text{O}_6$  before and after melting.

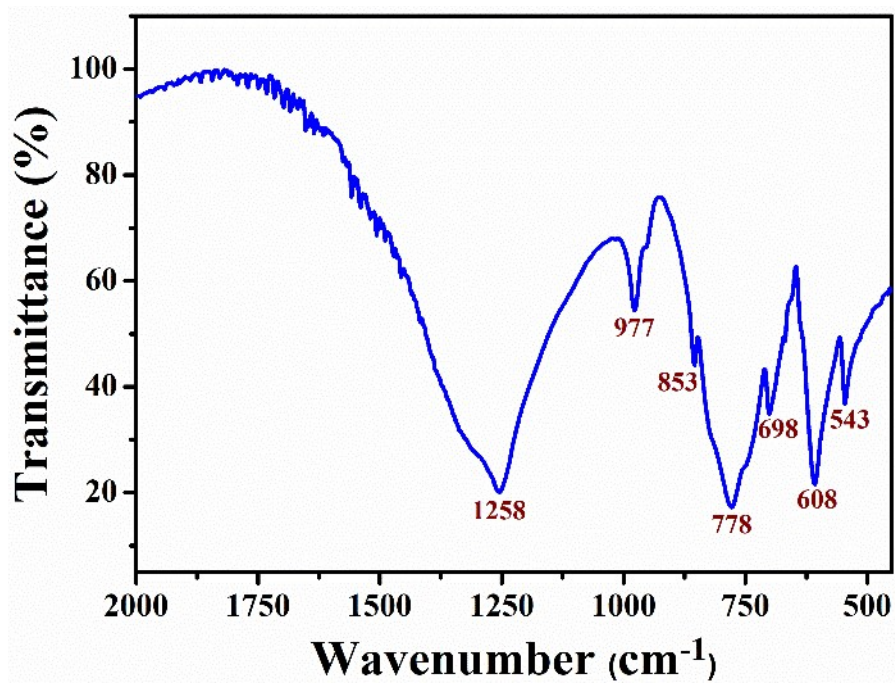

Figure S4. IR spectrum of PbBe<sub>2</sub>B<sub>2</sub>O<sub>6</sub>.

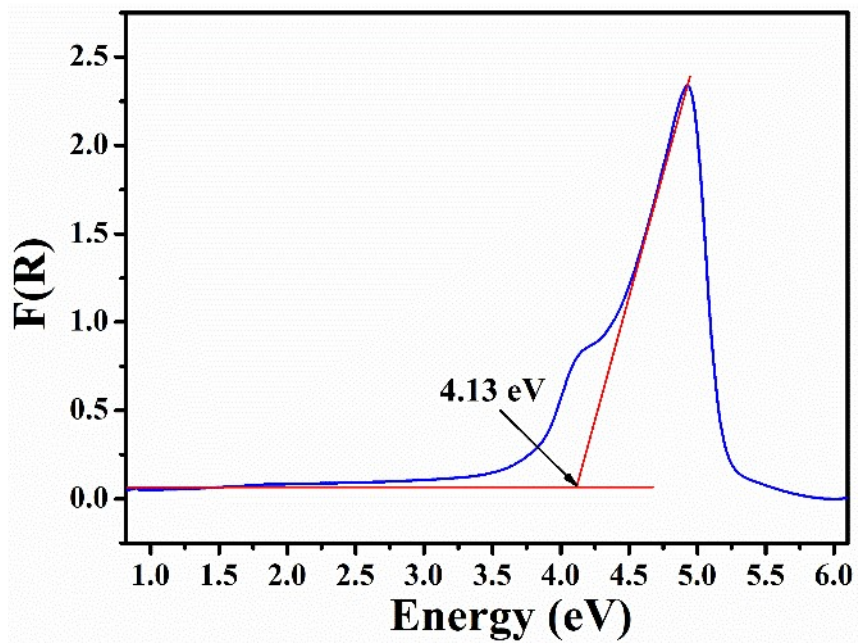

**Figure S5.** UV-visible-near-IR diffuse reflectance spectrum of  $\text{PbBe}_2\text{B}_2\text{O}_6$ .

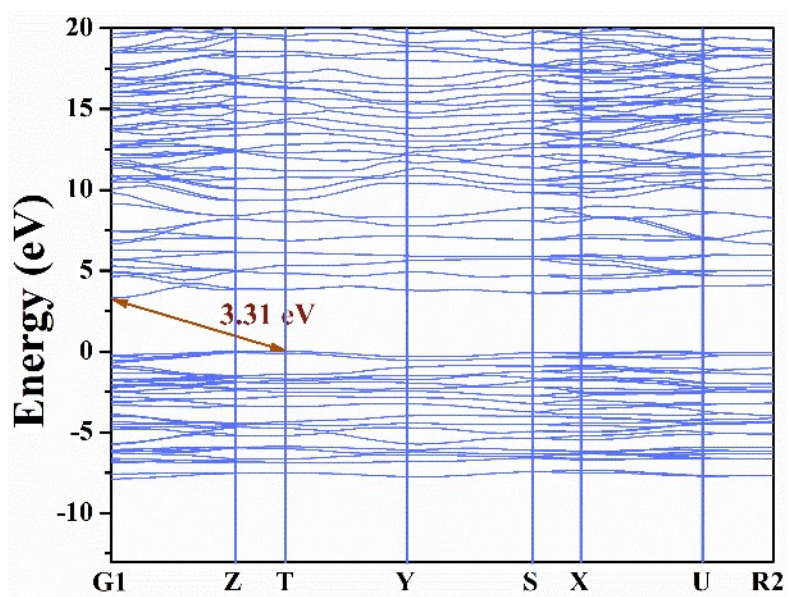

Figure S6. Electronic band structure of  $\text{PbBe}_2\text{B}_2\text{O}_6$ .

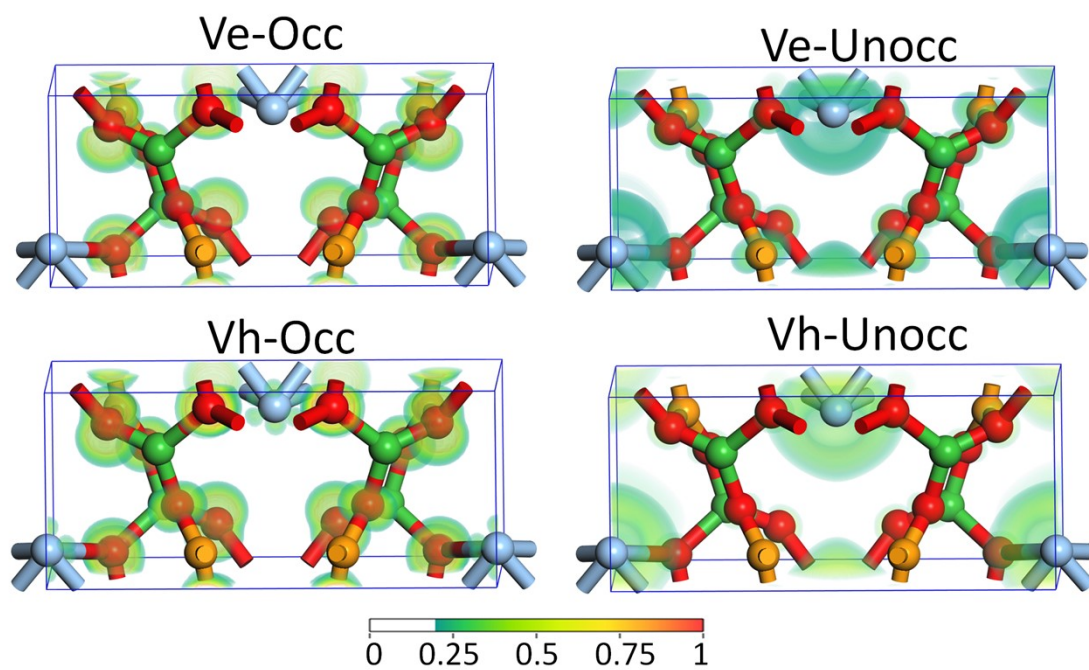

**Figure S7.** SHG-weighted electron density calculation of  $\text{PbBe}_2\text{B}_2\text{O}_6$ .

## References

- 1 G. M. Sheldrick, *Acta Crystallogr. Sect. A: Found. Crystallogr.*, 2008, **64**, 112–122.
- 2 A. L. Spek, *J. Appl. Crystallogr.*, 2003, **36**, 7–13.
- 3 Y. G. Chen, C. Y. Yang, F. Wang, Y. Guo, X. X. Jiang and X. M. Zhang, *Chem. Commun.*, 2020, **56**, 8639–8642.
- 4 a) J. Y. Lu, F. Y. Guo and J. Z. Chen, *J. Cryst. Growth*, 2011, **314**, 15 7–162; b) A. Haberer and H. Huppertz, *J. Solid State Chem.*, 2009, **182**, 888–895; c) S. Lemanceau, G. Bertrand-Chadeyron, R. Mahiou, M. El-Ghozzi, J. C. Cousseins, P. Conflant and R. N. Vannier, *J. Solid State Chem.*, 1999, **148**, 229–8235; d) S. Z. Shmurak, V. V. Kedrov, A. P. Kiselev, T. N. Fursova and I. M. Shmyt'ko, *Phys. Solid State*, 2015, **57**, 1588–1600.
- 5 S. K. Kurtz and T. T. Perry, *J. Appl. Phys.*, 1968, **39**, 3798–3813.
- 6 P. Kubelka and F. Munk, *Z. Techn. Phys.* 1931, **12**, 593–603.
- 7 a) I. D. Brown and D. Altermatt, *Acta Crystallogr. Sect. B: Struct. Sci.*, 1985, **41**, 244–247; b) N. E. Brese and M. O'Keeffe, *Acta Crystallogr. Sect. B: Struct. Sci.* 1991, **47**, 192–197.
- 8 a) M. C. Payne, M. P. Teter, D. C. Allan, T. A. Arias and J. D. Joannopoulos, *Mod. Phys.*, 1992, **64**, 1045–1097; b) S. J. Clark, M. D. Segall, C. J. Pickard, P. J. Hasnip, M. J. Probert, K. Refson and M. C. Payne, 2005, **220**, 567–570.
- 9 A. M. Rappe, K. M. Rabe, E. Kaxiras and J. D. Joannopoulos, *Phys. Rev. B*, 1990, **41**, 1227–1230.
- 10 D. R. Hamann, M. Schluter and C. Chiang, *Phys. Rev. Lett.*, 1979, **43**, 1494–1497.
- 11 H. J. Monkhorst and J. D. Pack, *Phys. Rev. B: Solid State*, 1976, **13**, 5188–5192.
- 12 R. W. Godby, M. Schluter and L. J. Sham, *Phys. Rev. B*, 1988, **37**, 10159–10175.
- 13 a) Z. S. Lin, X. X. Jiang, L. Kang, P. F. Gong, S. Y. Luo and M. H. Lee, *J. Phys. D: Appl. Phys.*, 2014, **47**, 253001; b) J. Lin, M. H. Lee, Z. P. Liu, C. T. Chen and C. Pickard, *J. Phys. Rev. B: Condens. Matter Mater. Phys.*, 1999, **60**, 13380–13389.
- 14 R. He, Z. S. Lin, M. H. Lee and C. T. Chen, *J. Appl. Phys.*, 2011, **109**, 103510.
- 15 M. H. Lee, C. H. Yang and J. H. Jan, *Phys. Rev. B*, 2004, **70**, 155–163.
- 16 S. Grimme, S. Ehrlich and L. Goerigk, *J. Comput. Chem.*, 2011, **32**, 1456–1465.
- 17 H. W. Yu, S. L. Pan, H. P. Wu, W. W. Zhao, F. F. Zhang, H. Y. Li and Z. H. Yang, *J. Mater. Chem.*, 2012, **22**, 2105–2110.
- 18 F. Sun, L. Wang and C. C. Stoumpos, *J. Solid State Chem.*, 2016, **240**, 61–66.
- 19 J. Cao, S. L. Pan, J. Gao, Z. Huang, X. Dong and M. Zhang, *Solid State Sci.*, 2012, **14**, 948–951.
- 20 X. L. Tang, D. X. Feng, S. M. Wan, L. Kang, B. Zhang and Z. S. Lin, *Mater. Chem. Phys.*, 2015, **163**, 501–506.
- 21 X. Chen, J. L. Zuo, X. N. Chang, Y. H. Zhao, H. J. Zang, W. Q. Xiao, *J. Solid State Chem.*, 2006, **179**, 3191–3195.
- 22 L. Y. Dong, S. L. Pan, H. P. Wu, X. Su, H. W. Yu, Y. Wang, Z. H. Chen, Z. G. Huang and Z. H. Yang, *J. Solid State Chem.*, 2013, **204**, 64–69.
- 23 W. W. Zhao, S. L. Pan, X. Y. Dong, J. J. Li, X. L. Tian, X. Y. Fan, Z. H. Chen and F. F. Zhang, *Mater. Res. Bull.*, 2012, **47**, 947–951.
- 24 W. W. Zhao, S. L. Pan, J. Han, J. Y. Yao, Y. Yang, J. J. Li, M. Zhang, L. H. Zhang and Y. Hang, *J. Solid State Chem.*, 2011, **184**, 2849–2853.
- 25 G. H. Zou, C. S. Lin, H. Jo, G. Nam, T. S. You and K. M. Ok, *Angew. Chem. Int. Ed.*, 2016, **55**, 12078–82.
- 26 H. E. Behm, *Acta Crystallogr. C Struct. Chem.*, 1983, **39**, 1317–1319.
- 27 M. Luo, Y. X. Song, F. Lang, N. Ye and Z. S. Lin, *Inorg. Chem. Front.*, 2018, **5**, 916–921.
- 28 L. Y. Dong, J. Yang, S. G. Shen, Z. Z. Liu, X. J. Chen and S. F. Sun, *Z. Anorg. Allg. Chem.*, 2017, **643**, 471–476.
- 29 L. Y. Dong, S. L. Pan, Y. Wang, H. W. Yu, X. Y. Dong, S. J. Han and M. Zhang, *Inorg. Chem.*, 2013, **52**, 11377–11384.
- 30 J. J. Zhou, H. P. Wu, H. W. Yu, Z. G. Hu and Y. C. Wu, *Dalton Trans.*, 2019, **48**, 14996–15001.



- 31 K. Li, A. Yalikul and Z. Su, *Dalton Trans.*, 2020, **49**, 8985–8990.
- 32 X. Y. Dong, Q. Jing, Y. J. Shi, Z. H. Yang, S. L. Pan, R. K. Poeppelmeier and J. S. Young, *J. Am. Chem. Soc.*, 2015, **137**, 9417–9422.
- 33 Q. Jing, X. Dong, Z. Yang and S. L. Pan, *Dalton Trans.*, 2015, **44**, 16818–16823.
- 34 L. Liu, B. Zhang, F. F. Zhang, S. L. Pan, X. Zhang, X. Dong and Z. H. Yang, *Dalton Trans.*, 2015, **44**, 7041–7047.
- 35 H. Park, R. Lam, J. E. Greedan and J. Barbier, *Chem. Mater.*, 2003, **15**, 1703–1712.
- 36 M. M. Murshed, A. Rusen, R. X. Fischer and T. M. Gesing, *Mater. Res. Bull.*, 2012, **47**, 1323–1330.
- 37 H. Park, J. Barbier and R. P. Hammond, *Solid State Sci.*, 2003, **5**, 565–571.
- 38 M. M. Murshed, G. Nénert and T. M. Gesing, *Z. Krist. New Cryst. St.*, 2012, **227**, 285–286.
- 39 J. Y. Gao, S. L. Pan, J. Cao, X. Y. Dong, Z. H. Yang, *Chem. Lett.*, 2012, **41**, 450–451.
- 40 J. J. Li, S. L. Pan, W. W. Zhao, X. L. Tian, J. Han and X. Y. Fan, *Solid State Sci.*, 2011, **13**, 966–969.
- 41 S. L. Pan, J. P. Smit, M. R. Marvel, C. L. Stern, B. Watkins and K. R. Poeppelmeier, *Mater. Res. Bull.*, 2006, **41**, 916–924.
- 42 X. A. Chen, Y. H. Zhao, X. A. Chang, L. Zhang and H. P. Xue, *Acta Crystallogr. C Struct. Chem.*, 2006, **62**, i11–i12.
- 43 A. H. Reshak, X. Chen, S. Auluck and H. Kamarudin, *Mater. Res. Bull.*, 2012, **47**, 2552–2560.
- 44 J. Head, P. Manuel, F. Orlandi, M. Jeong, M. R. Lees, R. Li and C. Greaves, *Chem. Mater.* 2020, **32**, 10184–10199.
- 45 H. Y. Li, S. L. Pan and H. P. Wu, Synthesis, *Acta Crystallogr. C Struct. Chem.*, 2011, **509**, 3310–3313.
- 46 M. Wen, H. P. Wu, C. Hu, Z. H. Yang and S. L. Pan, *Inorg. Chem.*, 2019, **58**, 1127–11132.
- 47 H. W. Yu, H. P. Wu and Q. Jing, *Chem. Mater.*, 2015, **27**, 4779–4788.
- 48 X. Pan, H. P. Wu, M. Wen, B. B. Zhang, Z. H. Yang and S. L. Pan, *Inorg. Chem. Front.*, 2018, **5**, 2501–2507.
- 49 M. Abudourehman, L. Wang and X. M. Zhang, *Inorg. Chem.*, 2015, **54**, 4138–4142.
- 50 J. L. Song, C. L. Hu and X. Xu, *Angew. Chem. Int. Ed.*, 2015, **127**, 3750–3753.
- 51 Y. Wang, S. L. Pan and S. S. Huang, *Dalton Trans.*, 2014, **43**, 12886–12893.
- 52 S. S. Huang, H. W. Yu and J. Han, *Eur. J. Inorg. Chem.*, 2014, **22**, 3467–3473.
- 53 T. T. Ruan, W. W. Wang, C. L. Hu, X. Xu and J. G. Mao, *J. Solid State Chem.*, 2018, **260**, 39–45.
- 54 S. V. Krivovichev, R. Turner, M. Rumsey, O. I. Siidra and C. A. Kirk, *Mineral. Mag.*, 2009, **73**, 103–117.
- 55 O. I. Siidra, S. V. Krivovichev, R. W. Turner, M. S. Rumsey and J. Spratt, *Am. Mineral.*, 2013, **98**, 256–261.
- 56 O. V. Yakubovich, W. Massa and N. V. Chukanov, *Crystallogr. Rep.* 2008, **53**, 206–215.
- 57 N. V. Chukanov, E. Jonsson, S. M. Aksenov, S. N. Britvin, R. K. Rastsvetaeva, D. I. Belakovskiy and K. V. Van, *Phys. Chem. Miner.*, 2017, **44**, 685–699.
- 58 F. F. Zhang, F. Y. Zhang, B. H. Lei, Z. H. Yang and S. L. Pan, *J. Phys. Chem. C*, 2016, **120**, 12757–12764.
- 59 J. Krogh-Moe and P. S. Wold-Hansen, *Acta Crystallogr. C Struct. Chem.*, 1973, **29**, 2242–2246.
- 60 D. L. Corker and A. M. Glazer, *Acta Crystallogr. C Struct. Chem.*, 1996, **52**, 260–265.
- 61 L. Dong, Y. Wang, B. B. Zhang, Z. H. Yang, X. Ge, K. Liu and S. Shen, *Inorg. Chem.*, 2019, **58**, 1750–1754.
- 62 H. R. Tian, W. H. Wang, Y. E. Gao, T. T. Deng, J. Y. Wang, Y. L. Feng and J. W. Cheng, *Inorg. Chem.*, 2013, **52**, 6242–6244.
- 63 S. Schoenegger, T. S. Ortner, K. Wurst, G. Heymann and H. Huppertz, *Z. Naturforsch. B*, 2016, **71**, 925–933.
- 64 P. P. Wang and Z. H. Liu, *Thermochimica. Acta*, 2011, **515**, 91–95.
- 65 D. Rajesh, M. D. Naidu and Y. C. Ratnakaram, *J. Phys. Chem. Solids*, 2014, **75**, 1210–1216.
- 66 Y. C. Hao, X. Xu, F. Kong, J. L. Song and J. G. Mao, *CrystEngComm*, 2014, **16**, 7689.
- 67 H. W. Yu, H. P. Wu, S. L. Pan, B. B. Zhang, L. Dong, S. Han and Z. H. Yang, *New J. Chem.*, 2014, **38**, 285–291.
- 68 S. L. Pan, B. Watkins, J. P. Smit, M. R. Marvel, I. Saratovsky and K. R. Poeppelmeier, *Inorg. Chem.*, 2007, **46**, 3851–3855.
- 69 J. C. Shi, D. Zhao, Z. Ma and R. J. Zhang, *Z. Kristallogr. Cryst. Mater.*, 2018, **233**, 753–760.



- 70 J. L. Song, C. L. Hu, X. Xu, F. Kong and J. G. Mao, *Inorg. Chem.*, 2013, **52**, 8979–8986.
- 71 L. W. Chang and K. H. Lii, *Dalton Trans.*, 2021, **50**, 11173–11179.
- 72 S. Hoffmann, H. B. T. Jeazet and P. W. Menezes, *Inorg. Chem.*, 2008, **47**, 10193–10195.
- 73 M. Yang, P. Chen and U. Welz-Biermann, *Z. Anorg. Allg. Chem.*, 2010, **636**, 1454–1460.
- 74 E. L. Belokoneva, I. K. Derkach and O. V. Dimitrova, *Crystallogr. Rep.*, 2013, **58**, 416–421.
- 75 C. T. Chen, G. L. Wang, X. Y. Wang and Z. Y. Xu, *Appl. Phys. B: Laser Opt.*, 2009, **97**, 9–25.
- 76 S. Guo, L. Kang, L. Liu, M. Xia, Z. Lin, Q. Huang, Z. Hou, C. Tang, X. Wang and C. T. Chen, *J. Cryst. Growth*, 2019, **518**, 45–50.
- 77 C. T. Chen, S. Luo, X. Wang, G. Wang, X. Wen, H. Wu, X. Zhang and Z. Xu, *J. Opt. Soc. Am. B*, 2009, **26**, 1519–1525.
- 78 H. Huang, C. T. Chen, X. Wang, Y. Zhu, G. Wang, X. Zhang, L. Wang and J. Yao, *J. Opt. Soc. Am. B*, 2011, **28**, 2186–2190.
- 79 C. D. McMillen, J. Hu, D. VanDerveer and J. W. Kolis, *Acta. Crystallogr. B Struct. Sci.*, 2009, **65**, 445–449.
- 80 G. Peng, N. Ye, Z. Lin, L. Kang, S. Pan, M. Zhang, C. Lin, X. Long, M. Luo, Y. Chen, Y. H. Tang, F. Xu and T. Yan, *Angew Chem. Int. Ed.*, 2018, **57**, 8968–8972.
- 81 M. Xia, Z. Lin, Y. Wu and C. T. Chen, *J. Synth. Cryst.*, 2005, **34**, 597–598.
- 82 S. C. Wang, N. Ye, W. Li and D. Zhao, *J. Am. Chem. Soc.*, 2010, **132**, 8779–8786.
- 83 a) H. W. Huang, L. J. Liu, S. F. Jin, W. J. Yao, Y. H. Zhang and C. T. Chen, *J. Am. Chem. Soc.*, 2013, **135**, 18319–18322. b) X. X. Jiang, S. Y. Luo, L. Kang, P. F. Gong, H. W. Huang, S. C. Wang, Z. S. Lin and C. T. Chen, *ACS Photonics*, 2015, **2**, 1183–1191.
- 84 S. C. Wang and N. Ye, *J. Am. Chem. Soc.*, 2011, **133**, 11458–11461.
- 85 C. T. Chen, Y. B. Wang, B. C. Wu, K. C. Wu, W. L. Zeng and L. H. Yu, *Nature*, 1995, **373**, 322–324.
- 86 C. T. Chen, N. Ye, B. Wu, W. Zeng, Q. Zhang, C. Zhang and Y. Zhang, *Proc. Int. Symp. Laser & Nonlinear Optical Materials, Singapore*, 1997, pp. 103–119.
- 87 S. Guo, X. Jiang, L. Liu, M. Xia, Z. Fang, X. Wang, Z. Lin and C. T. Chen, *Chem. Mater.*, 2016, **28**, 8871–8875.
- 88 N. Yu, S. C. Wang, N. Ye, F. Liang, Z. S. Lin, M. Luo and K. R. Poeppelmeier, *Chem. Mater.*, 2016, **28**, 4563–4571.
- 89 S. Guo, F. Liang, L. Liu, M. Xia, Z. Fang, R. Wu, X. Wang, Z. Lin and C. T. Chen, *New J. Chem.*, 2017, **41**, 4269–4272.
- 90 H. W. Huang, J. Y. Yao, Z. S. Lin, X. Y. Wang, R. He, W. J. Yao, N. X. Zhai and C. T. Chen, *Angew. Chem. Int. Ed.*, 2011, **50**, 9141–9144.
- 91 H. W. Huang, J. Y. Yao, Z. Lin, X. Y. Wang, R. He, W. J. Yao, N. X. Zhai and C. T. Chen, *Chem. Mater.*, 2011, **23**, 5457–5463.
- 92 X. Yan, S. Luo, Z. Lin, J. Yao, R. He, Y. Yue and C. T. Chen, *Inorg. Chem.*, 2014, **53**, 1952–1954.
- 93 X. Yan, S. Luo, Z. Lin, Y. Yue, X. Wang, L. Liu and C. T. Chen, *J. Mater. Chem. C*, 2013, **1**, 3616–3622.
- 94 Z. Dai, Y. G. Chen, Y. Guo, F. Wang, Y. Y. Yang and X. M. Zhang, *Inorg. Chem.*, 2021, **60**, 11214–11221.
- 95 S. J. Lin, Z. Y. Sun, B. C. Wu and C. T. Chen, *J. Appl. Phys.*, 1990, **67**, 634–638.
- 96 Y. Wu, T. Sasaki, S. Nakai, A. Yokotani, H. Tang and C. T. Chen, *Appl. Phys. Lett.* 1993, **62**, 2614–2615.
- 97 J. M. Tu and D. A. Keszler, *Mater. Res. Bull.*, 1995, **30**, 209–215.
- 98 H. Kouta, Y. Kuwano, K. Ito and F. Marumo, *J. Cryst. Growth*, 1991, **114**, 676–682.
- 99 H. Hellwig, J. Liebertz and L. Bohatý, *Solid. State. Commun.*, 1998, **109**, 249–251.
- 100 S. G. Zhao, P. F. Gong, L. Bai, X. Xu, S. Q. Zhang, Z. H. Sun, Z. S. Lin, M. C. Hong, C. T. Chen and J. H. Luo, *Nat. Commun.*, 2014, **5**, 4019.
- 101 L. Wu, X. L. Chen, Y. P. Xu and Y. P. Sun, *Inorg. Chem.*, 2006, **45**, 3042–3047.
- 102 M. Mączka, A. Waśkowska, A. Majchrowski, J. Żmija, J. Hanuza, G. A. Peterson and D. A. Keszler, *J. Solid. State.*

- Chem.*, 2007, **180**, 410–419.
- 103 B. B. Zhang, Z. H. Yang, Y. Yang, M. H. Lee, S. L. Pan, Q. Jing and X. Su, *J. Mater. Chem. C.*, 2014, **2**, 4133–4141.
- 104 Y. Yang, S. L. Pan, H. Y. Li, J. Han, Z. H. Chen, W. W. Zhao and Z. X. Zhou, *Inorg. Chem.*, 2011, **50**, 2415–2419.
- 105 Y. Yang, S. L. Pan, J. Han, X. L. Hou, Z. X. Zhou, W. W. Zhao, Z. H. Chen and M. Zhang, *Cryst. Growth. Des.*, 2011, **11**, 3912–3916.
- 106 Y. Yang, S. L. Pan, X. L. Hou, C. Y. Wang, K. R. Poeppelmeier, Z. H. Chen, H. P. Wu and Z. X. Zhou, *J. Mater. Chem. C.*, 2011, **21**, 2890–2894.
- 107 L. Li, S. J. Han, B. H. Lei, X. Y. Dong, H. P. Wu, Z. X. Zhou, Z. H. Yang and S. L. Pan, *Inorg. Chem.*, 2015, **54**, 7381–7387.
- 108 L. Wu, X. L. Chen, Y. P. Xu and Y. P. Sun, *Inorg. Chem.*, 2006, **45**, 3042–3047.
- 109 P. Ren, Y. Yang, H. Li, Z. Yang and S. L. Pan, *New J. Chem.*, 2019, **43**, 9354–9363.
- 110 L. Wu, J. Sun, Y. Zhang, S. Jin, Y. Kong and J. Xu, *Inorg. Chem.*, 2010, **49**, 3958–3958.
- 111 M. Fisch, T. Armbruster, D. Rentsch, E. Libowitzky and T. Pettke, *J. Solid. State. Chem.*, 2011, **184**, 70–80.
- 112 N. Ye, W. R. Zeng, J. Jiang, B. C. Wu, C. T. Chen, B. H. Feng and X. L. Zhang, *J. Opt. Soc. Am. B.*, 2000, **17**, 764–768.
- 113 T. T. Tran, N. Z. Koocher and J. M. Rondinelli, *Angew. Chem. Int. Ed.*, 2017, **129**, 3015–3019.
- 114 Z. Fang, X. X. Jiang, M. H. Duan, Z. Y. Hou, C. C. Tang, M. J. Xia, L. J. Liu, Z. S. Lin, F. D. Fan, L. Bai and C. T. Chen, *Chem. Eur. J.*, 2018, **24**, 7856–7860.
- 115 T. H. Bahti, S. J. Han, W. Q. Jin, Z. H. Yang and S. L. Pan, *Dalton. Trans.*, 2021, **50**, 822–825.
- 116 Q. Huang, L. J. Liu, M. J. Xia, Y. Yang, S. Guo, X. Y. Wang, Z. S. Lin and C. T. Chen, *Crystals*, 2017, **7**, 104.
- 117 X. Yu, Y. Yue, J. Yao and Z. G. Hu, *J. Cryst. Growth.*, 2010, **312**, 3029–3033.
- 118 X. Gao and R. K. Li, *Opt. Mater.*, 2014, **36**, 2026–2029.
- 119 S. C. Wang and N. Ye, *Solid. State. Sci.*, 2007, **9**, 713–717.
- 120 Q. Ye and B. H. T. Chai, *J. Cryst. Growth.*, 1999, **197**, 228–235.
- 121 W. W. Zhou, R. Z. Zhuang, W. Zhao, G. F. Wang, L. Z. Zhang, J. G. Ma, X. Bao, F. W. Wang and Y. H. Chen, *Cryst. Res. Technol.*, 2011, **46**, 926–930.
- 122 G. C. Zhang, Y. C. Wu, Y. Li, F. Chang, S. L. Pan, P. Z. Fu and C. T. Chen, *J. Cryst. Growth.*, 2005, **275**, 1997–2001.
- 123 W. H. Liu, X. M. Liu, X. H. Meng, C. X. Li, M. R. Sun, Z. S. Lin and J. Y. Yao, *J. Alloys. Compd.*, 2022, **902**, 163832.
- 124 J. Feng, Y. Liu, Y. Li, H. Song, W. Liu, X. Jiang, Z. Lin and G. Zhang, *Cryst. Growth. Des.*, 2020, **20**, 5626–5632.
- 125 Z. Jia, Q. Zeng, P. Gong, Y. Dong, X. Zhang, B. Xin, Z. Lin and M. J. Xia, *Inorg. Chem.*, 2020, **59**, 13029–13033.
- 126 M. G. Gao, H. P. Wu, H. W. Yu, Z. G. Hu, J. Y. Wang and Y. C. Wu, *Sci. China. Chem.*, 2021, **64**, 1184–1191.
- 127 R. Q. Liu, H. P. Wu, H. W. Yu, Z. G. Hu, J. Y. Wang and Y. C. Wu, *Chem. Mater.*, 2021, **33**, 4240–4246.
- 128 Y. F. Li, F. Liang, H. M. Song, W. Liu, Z. S. Lin, G. C. Zhang and Y. C. Wu, *Inorg. Chem.*, 2019, **58**, 8943–8947.
- 129 N. Ye, Y. Zhang, W. Chen, D. A. Keszler, G. Aka, *J. Cryst. Growth.*, 2006, **292**, 464–467.
- 130 W. Liu, X. M. Liu, J. Shen, Y. F. Li, H. M. Song, J. C. Feng, Z. S. Lin and G. C. Zhang, *Dalton. Trans.*, 2020, **49**, 9355–9361.
- 131 W. H. Liu, X. M. Liu, X. H. Meng, C. X. Li, M. R. Sun, Z. S. Lin and J. Y. Yao, *J. Alloys. Compd.*, 2022, **902**, 163832.
- 132 H. W. Yu, H. P. Wu, S. L. Pan, Z. H. Yang, X. L. Hou, X. Su, Q. Jing, K. R. Poeppelmeier and J. M. Rondinelli, *J. Am. Chem. Soc.*, 2014, **136**, 1264–1267.
- 133 W. G. Zhang, H. W. Yu, H. P. Wu and P. S. Halasyamani, *Crystals*, 2016, **6**, 68.
- 134 M. H. Duan, M. J. Xia and R. K. Li, *Inorg. Chem.*, 2017, **56**, 11458–11461.
- 135 Z. J. Li, W. Q. Jin, F. F. Zhang, Z. L. Chen, Z. H. Yang and S. L. Pan, *Angew. Chem. Int. Ed.*, 2022, **61**, e202112844.

- 136 T. J. Baiheti, A. K. Tudi, J. Han, Z. H. Yan and S. L. Pan, *J. Mater. Chem. C.*, 2022, **10**, 1727–1734.
- 137 Q. Q. Zhang, F. F. Zhang, F. M. Li, S. J. Han and Z. H. Yang, *Eur. J. Inorg. Chem.*, 2021, **13**, 1297–1304.
- 138 Z. Q. Xie, Y. Wang, S. C. Cheng, G. P. Han, Z. H. Yang and S. L. Pan, *Sci. China. Materi.*, 2019, **62**, 1151–1161.
- 139 Y. C. Wu, G. F. Wang, P. Z. Fu, X. Y. Liang, Z. Y. Xu and C. T. Chen, *J. Cryst. Growth.*, 2001, **229**, 205–207.
- 140 X. Y. Cao, W. Liu, S. Liu, L. X. Cao, G. Su, R. J. Gao and Y. Jiang, *J. Alloys. Compd.*, 2016, **665**, 204–209.
- 141 H. W. Yu, W. J. Zhang, J. Young, J. M. Rondinelli and P. S. Halasyamani, *Adv. Mater.*, 2015, **27**, 7380–7385.
- 142 M. J. Xia and R. K. Li, *J. Solid. State. Chem.*, 2013, **201**, 288–292.
- 143 H. W. Yu, S. L. Pan, H. P. Wu, W. W. Zhao, F. F. Zhang, H. Y. Li and Z. H. Yang, *J. Med. Chem.*, 2012, **22**, 2105–2110.
- 144 L. Y. Dong, Y. Wang, B. B. Zhang, Z. H. Yang, X. S. Ge, K. Liu and S. G. Shen, *Inorg. Chem.*, 2019, **58**, 1750–1754.
- 145 G. Peng, C. S. Lin, H. X. Fan, K. C. Chen, B. X. Li, G. Zhang and N. Ye, *Angew. Chem. Int. Ed.*, 2021, **60**, 17415–17418.
- 146 X. F. Wang, F. F. Zhang, L. Gao, Z. Yang and S. L. Pan, *Adv. Sci.*, 2019, **190**, 1679.
- 147 M. Touboul, E. Bétourné and G. Nowogrocki, *J. Solid. State. Chem.*, 1995, **115**, 549–553.
- 148 C. Wu, L. H. Li, J. L. Song, G. Yang, M. G. Humphrey and C. Zhang, *Inorg. Chem.*, 2017, **56**, 1340–1348.
- 149 Y. J. Wang, S. L. Pan, X. L. Tian, Z. X. Zhou, G. Liu, J. D. Wang and D. Jia, *Inorg. Chem.*, 2009, **48**, 7800–7804.
- 150 E. R. Wang, J. H. Huang, S. J. Yu, Y. Z. Lan and J. W. Cheng, *Inorg. Chem.*, 2017, **56**, 6780–6783.
- 151 Q. Liu, X. Y. Zhang, Z. H. Yang, F. F. Zhang, L. L. Liu, J. Han, Z. Li and S. L. Pan, *Inorg. Chem.*, 2016, **55**, 8744–8749.
- 152 Y. T. Shi, M. Luo, C. S. Lin, G. Peng and N. Ye, *Cryst. Growth. Des.*, 2019, **19**, 3052–3059.
- 153 H. Hellwig, P. Becker, S. Ahrweiler and L. Bohatý, *Cryst. Res. Technol.*, 2000, **35**, 1151–1161.
- 154 H. Q. Wu, Q. Wei, H. He, B. F. Yang, Q. Zhang and Y. Y. Guo, *Inorg. Chem. Commun.*, 2014, **46**, 69–72.
- 155 N. A. Yamnova, N. V. Zubkova, O. V. Dimitrova and N. N. Mochanova, *Crystallogr. Rep.*, 2009, **54**, 800–813.
- 156 Q. Wei, J. W. Cheng, C. He and G. Y. Yang, *Inorg. Chem.*, 2014, **53**, 11757–11763.
- 157 F. Y. Zhang, F. F. Zhang, J. Qun, S. L. Pan, Z. H. Yang and D. Z. Jia, *Phys. Chem. Chem. Phys.*, 2015, **17**, 10489–10496.
- 158 F. Y. Zhang, Q. Jing, F. F. Zhang, S. L. Pan, Z. H. Yang, J. Han, M. Zhang and S. J. Hua, *J. Mater. Chem. C.*, 2014, **2**, 667–674.
- 159 L. Wang, S. L. Pan, L. X. Chang, J. Y. Hu and H. W. Yu, *Inorg. Chem.*, 2012, **51**, 1852–1858.
- 160 C. Wu, L. H. Li, J. L. Song, G. Yang, M. G. Humphrey and C. Zhang, *Inorg. Chem.*, 2017, **56**, 1340–1348.
- 161 Q. Wei, L. Sun, J. Zhang and G. Y. Yang, *Dalton. Trans.*, 2017, **46**, 7911–7916.
- 162 J. J. Lu, G. Q. Shi, H. P. Wu, M. Wen, D. W. Hou, Z. H. Yang, F. F. Zhang and S. L. Pan, *RSC. Adv.*, 2017, **7**, 20259–20265.
- 163 H. Q. Wu and Y. Y. Li, *Inorg. Chem. Commun.*, 2020, 121, 108220.
- 164 L. Cheng, Q. Wei, H. Q. Wu, L. J. Zhou and G. Y. Yang, *Chem–Eur. J.*, 2013, **19**, 17662–17667.
- 165 X. Y. Li and G. Y. Yang, *Inorg. Chem. Commun.*, 2019, **102**, 262–266.
- 166 C. Wu, L. G. Li, J. L. Song, G. Yang, M. G. Humphrey and C. Zhang, *Inorg. Nano-Met. Chem.*, 2017, **4**, 692–700.
- 167 J. H. Huang, C. C. Jin, P. L. Xu, P. Gong, Z. Lin, J. W. Cheng and G. Y. Yang, *Inorg. Chem.*, 2019, **58**, 1755–1758.
- 168 C. A. Chen and G. Y. Yang, *CrystEngComm.*, 2022, **24**, 1203–1210.
- 169 C. Wu, X. X. Jiang, L. Lin, W. Y. Dan, Z. S. Lin, Z. P. Huang, G. Mark and C. Zhang, *Angew. Chem. Int. Ed.*, 2021, **133**, 27357–27363.
- 170 H. W. Huang, R. He, W. J. Yao, Z. S. Lin and C. T. Chen, *J. Cryst. Growth.*, 2013, **380**, 176–181.
- 171 F. Lin, Y. P. Dong, J. Y. Peng, L. P. Wang, W. Li and B. Yang, *Phase. Transit.*, 2016, **89**, 996–1005.
- 172 X. F. Yi, W. H. Fang, J. Y. Liu, C. Chen, M. Y. Wu and L. Zhang, *Advanced. Structural. Chemistry.*, 2021, **1**,

- 111–161.
- 173 G. Huang, R. Pan, H. He, B. F. Yang and G. Y. Yang, *Inorg. Chem.*, 2015, **59**, 17–20.
- 174 F. Y. Zhang, F. F. Zhang, D. Z. Jia and S. L. Pan, *Front. Mater.*, 2015, **4**, 44–49.
- 175 Y. X. Song, G. S. Yang, P. F. Gong, M. Luo, Z. S. Lin, N. Ye, *Inorg. Chem.*, 2020, **59**, 7789–7794.
- 176 G. Q. Shi, Y. Wang, F. F. Zhang, B. B. Zhang, Z. H. Yang, X. L. Hou, S. L. Pan and K. R. Poeppelmeier, *J. Am. Chem. Soc.*, 2017, **139**, 10645–10648.
- 177 T. Pilz and M. Jansen, *Z. Anorg. Allg. Chem.*, 2011, **637**, 2148–2152.
- 178 S. Lei, Q. Huang, Y. Zheng, A. Jiang and C. Chen, *Acta. Crystallogr. C. Struct. Chem.*, 1989, **49**, 1861–1863.
- 179 Y. Wang, B. B. Zhang, Z. H. Yang and S. L. Pan, *Angew. Chem. Int. Ed.*, 2018, **57**, 2150–2154.
- 180 W. Y. Zhang, Z. L. Wei, Z. H. Yang and S. L. Pan, *Inorg. Chem.*, 2020, **59**, 3274–3280.
- 181 X. F. Wang, Y. Wang, B. B. Zhang, F. F. Zhang, Z. H. Yang and S. L. Pan, *Angew. Chem. Int. Ed.*, 2017, **129**, 14307–14311.
- 182 Z. Z. Zhang, Y. Wang, B. B. Zhang, Z. H. Yuan and S. L. Pan, *Inorg. Chem.*, 2018, **57**, 4820–4823.
- 183 M. Mutailipu, M. Zhang, B. B. Zhang, L. Y. Wang, Z. H. Yang, X. Zhou and S. L. Pan, *Angew. Chem. Int. Ed.*, 2018, **130**, 6203–6207.
- 184 Z. J. Huang, X. Su, S. L. Pan, X. Y. Dong, S. J. Han, H. W. Yu, M. Zhang, Y. Yang, S. F. Cui and Z. H. Yang, *Scr. Mater.*, 2013, **69**, 449–452.
- 185 H. W. Yu, H. P. Wu, S. L. Pan, Z. H. Yang, X. Su and F. F. Zhang, *J. Chem. Mater.*, 2012, **22**, 9665–9670.
- 186 H. P. Wu, H. W. Yu, W. G. Zhang, J. Cantwell, K. R. Poeppelmeier, S. L. Pan and P. S. Halasyamani, *Cryst. Growth Des.*, 2017, **17**, 1404–1410.
- 187 S. J. Han, M. P. Mutailipu, A. K. Tudi, Z. H. Yang and S. L. Pan, *Chem. Mater.*, 2020, **32**, 2172–2179.
- 188 H. W. Yu, H. P. Wu, S. L. Pan, Y. Wang, Z. H. Yang and X. Su, *Inorg. Chem.*, 2013, **52**, 5359–5365.
- 189 K. Xu, P. Loiseau and G. Aka, *J. Cryst. Growth.*, 2009, **311**, 2508–2512.
- 190 J. Zhao, M. J. Xia and R. K. Li, *J. Cryst. Growth.*, 2011, **318**, 971–973.
- 191 G. C. Zhang, Z. L. Liu, J. X. Zhang, F. D. Fan, Y. C. Liu and P. Z. Fu, *Cryst. Growth Des.*, 2009, **9**, 3137–3141.
- 192 S. G. Zhao, P. F. Gong, S. Y. Luo, L. N. Li, M. A. Asghar, T. Khan, M. C. Hong, Z. S. Lin and J. H. Luo, *J. Am. Chem. Soc.*, 2015, **137**, 2207–2210.
- 193 Z. G. Hu, M. Yoshimura, K. Muramatsu, Y. Mori and T. Sasaki, *Jpn. J. Appl. Phys.*, 2002, **41**, L1131.
- 194 J. N. Wang, Y. C. Yue, J. Y. Yao and Z. G. Hu, *J. Cryst. Growth.*, 2011, **318**, 962–965.
- 195 H. K. Liu, Y. Wang, B. B. Zhang, Z. H. Yang and S. L. Pan, *Chem. Sci.*, 2020, **11**, 694–698.
- 196 H. K. Liu, B. B. Zhang, L. Li and Y. Wang, *ACS Appl. Mater. Interfaces.*, 2021, **13**, 30853–30860.
- 197 B. Q. Zhao, L. Bai, B. X. Li, S. G. Zhao, Y. G. Shen, X. F. Li, Q. R. Ding, C. M. Ji, Z. S. Lin and J. H. Luo, *Cryst. Growth Des.*, 2018, **18**, 1168–1172.
- 198 H. W. Yu, J. S. Young, H. P. Wu, W. G. Zhang, J. M. Rondinelli and S. P. Halasyamani, *Adv. Opt. Mater.*, 2017, **5**, 1700840.
- 199 H. P. Wu, H. W. Yu, S. L. Pan and S. P. Halasyamani, *Inorg. Chem.*, 2017, **56**, 8755–8758.
- 200 J. J. Zhou, Y. Q. Liu, H. P. Wu, H. W. Yu, Z. S. Lin, Z. G. Hu, J. Y. Wang and Y. C. Wu, *Angew. Chem. Int. Ed.*, 2020, **59**, 19006–19010.
- 201 M. J. Xia and R. K. Li, *J. Solid. State. Chem.*, 2016, **233**, 58–61.
- 202 G. H. Zou, L. Y. Zhang and N. Ye, *CrystEngComm.*, 2013, **15**, 2422.
- 203 M. Luo, F. Liang, Y. X. Song, D. Zhao, N. Ye and Z. S. Lin, *J. Am. Chem. Soc.*, 2018, **140**, 6814–6817.
- 204 H. Y. Li, H. P. Wu, X. Su, H. W. Yu, S. L. Pan, Z. H. Yang, Y. Lu, J. Han and K. R. Poeppelmeier, *J. Mater. Chem. C.*, 2014, **2**, 1704–1710.
- 205 H. P. Wu, S. L. Pan, K. R. Poeppelmeier, H. Y. Li, D. Z. Jia, Z. H. Chen, X. Y. Fan, Y. Yang, J. M. Rondinelli and

- H. S. Luo, *J. Am. Chem. Soc.*, 2011, **133**, 7786–7790.
- 206 M. Zhang, X. Su, S. L. Pan, Z. Wang, H. Zhang, B. B. Zhang, L. Y. Dong, Y. Wang, F. F. Zhang and Y. Yang, *J. Phys. Chem. C.*, 2014, **118**, 11849–11856.
- 207 X. Y. Fan, Y. Zhang and K. D. Zhong, *Nanoscal.*, 2018, **10**, 20443–20452.
- 208 Z. J. Wang, J. G. He, B. Hu, P. Shan, Z. Y. Xiong, R. B. Su, C. He, X. M. Yang and X. F. Long, *ACS Appl. Mater. Interface.*, 2020, **12**, 4632–4637.
- 209 W. L. Zhang, Y. J. Liang, Y. L. Zhu, S. Q. Liu, H. R. Li and W. Lei, *J. Am. Ceram. Soc.*, 2019, **102**, 5223–5233.
- 210 H. W. Yu, S. L. Pan, H. P. Wu, Z. H. Yang, L. Y. Dong, X. Su, B. B. Zhang and H. Y. Li, *Cryst. Growth. Des.*, 2013, **13**, 3514–3521.
- 211 Z. Y. Xiong, J. G. He, B. Hu, P. Shan, Z. J. Wang, R. B. Su, C. He, X. M. Yang and X. F. Long, *ACS Appl. Mater. Interfaces.*, 2020, **12**, 42942–42948.
- 212 G. S. Yang, P. F. Gong, Z. S. Lin and N. Ye, *Chem. Mater.*, 2016, **28**, 9122–9131.
- 213 Q. Huang, L. J. Liu, X. Y. Wang, R. K. Li and C. T. Chen, *Inorg. Chem.*, 2016, **55**, 12496–12499.
- 214 X. X. Lin, F. F. Zhang, S. L. Pan, H. W. Yu, F. Y. Zhang, X. Y. Dong, S. J. Han, L. Y. Dong, C. Y. Bai and Z. Wang, *J. Mater. Chem. C.*, 2014, **2**, 4257.
- 215 Z. X. Lu, F. F. Zhang, A. Tudi, S. J. Yu, Z. H. Yang and S. L. Pan, *Inorg. Chem.*, 2019, **6**, 2200–2208.
- 216 G. H. Zou, C. S. Lin, H. Jo, G. Nam, T. S. You and K. M. Ok, *Angew. Chem. Int. Ed.*, 2016, **128**, 12257–12261.
- 217 M. Luo, C. S. Lin, G. H. Zou, N. Ye and W. D. Cheng, *CrystEngComm.*, 2014, **16**, 4414.
- 218 M. Luo, G. X. Wang, C. S. Lin, N. Ye, Y. Q. Zhou and W. D. Cheng, *Inorg. Chem.*, 2014, **53**, 8098–8104.
- 219 G. Peng, C. S. Lin and N. Ye, *J. Am. Chem. Soc.*, 2020, **142**, 20542–20546.
- 220 X. M. Liu, L. Kang, P. F. Gong and Z. S. Lin, *Angew. Chem. Int. Ed.*, 2021, **60**, 13574–13578.
- 221 W. Zhang and P. S. Halasyamani, *CrystEngComm.*, 2017, **19**, 4742–4748.
- 222 E. N. Rao, S. Appalakondaiah, N. Yedukondalu and G. Vaitheeswaran, *J. Solid. State. Chem.* **2014**, *212*, 171–179.
- 223 G. H. Zou, N. Ye, L. Huang and X. S. Lin, *J. Solid. State. Chem.*, 2011, **133**, 20001–20007.
- 224 T. T. Tran, J. Young, J. M. Rondinelli and P. S. Halasyamani, *J. Am. Chem. Soc.*, 2017, **139**, 1285–1295.
- 225 T. T. Tran, J. G. He, J. M. Rondinelli and P. S. Halasyamani, *J. Am. Chem. Soc.*, 2015, **137**, 10504–10507.
- 226 M. Luo, Y. S. Song, C. S. Lin, N. Ye, W. D. Cheng and X. F. Long, *Chem. Mater.*, 2016, **28**, 2301–2307.
- 227 G. H. Zou, N. Ye, L. Huang and X. S. Lin, *J. Am. Chem. Soc.*, 2011, **133**, 20001–20007.
- 228 T. T. Tran, J. Young, J. M. Rondinelli and P. S. Halasyamani, *J. Am. Chem. Soc.*, 2017, **139**, 1285–1295.
- 229 M. Luo, N. Ye, G. H. Zou, C. S. Lin and W. D. Cheng, *Chem. Mater.*, 2013, **25**, 3147–3153.
- 230 G. H. Zou, G. Nam, H. G. Kim, H. Jo, T. S. You and K. M. Ok, *RSC Adv.*, 2015, **5**, 84754–84761.
- 231 T. T. Tran, P. S. Halasyaman and J. M. Rondinelli, *Inorg. Chem.*, 2014, **53**, 6241–6251.
- 232 Y. T. Zhang, Y. Long, X. H. Dong, L. Wang, L. Huang, H. M. Zeng, Z. E. Lin, X. Wang and G. H. Zou, *ChemComm.*, 2019, **55**, 4538–4541.
- 233 X. H. Dong, L. Huang, Q. Y. Liu, H. M. Zeng, Z. E. Lin, D. G. Xu and G. H. Zou, *ChemComm.*, 2018, **54**, 5792–5795.
- 234 L. Huang, G. H. Zou, H. Q. Cai, S. C. Wang, C. S. Lin and N. Ye, *J. Mater. Chem. C.*, 2015, **3**, 5268–5274.
- 235 Y. X. Song, M. Luo, C. S. Lin, N. Ye, *Chem. Mater.*, 2017, **29**, 896–903.
- 236 V. I. Nasirov, N. M. Namazova, G. G. Guseinov and A. S. Amirov, *Crystallogr. Rep.*, 2015, **60**, 841–843.
- 237 F. F. Mao, C. L. Hu, B. X. Li and J. G. Mao, *Inorg. Chem.*, 2017, **56**, 14357–14365.
- 238 C. Wu, X. X. Jiang, Z. J. Wang, L. Lin, Z. S. Lin, Z. P. Huang, X. F. Long, M. G. Humphrey and C. Zhang, *Angew. Chem. Int. Ed.*, 2020, **60**, 3464–3468.
- 239 G. Peng, Y. Yang, Y. H. Tang, M. Luo, T. Yan, Y. Q. Zhou, C. S. Lin, Z. S. Lin and N. Ye, *ChemComm.*, 2017, **53**, 9398–9401.
